1  
2  
3  
4  
5  
6  
7  
8  
9  
10  
11  
12  
13  
14  
15  
16  
17  
18  
19  
20  
21  
22  
23  
24  
25  
26  
27

**Scoping the Line Up: A Comparison of Biomonitoring Methodologies for Surf Zone Fish Communities**

Zachary Gold<sup>1</sup> ¶\*, McKenzie Q. Koch<sup>1</sup> ¶, Nicholas K. Schooler<sup>2</sup>, Kyle A. Emery<sup>2</sup>, Jenifer E. Dugan<sup>2</sup>, Robert J. Miller<sup>2</sup>, Henry M. Page<sup>2</sup>, Donna M. Schroeder<sup>3</sup>, David M. Hubbard<sup>2</sup>, Jessica R. Madden<sup>2</sup>, Stephen G. Whitaker<sup>2,4</sup>, and Paul H. Barber<sup>1</sup>

<sup>1</sup>Department of Ecology and Evolutionary Biology, University of California Los Angeles, CA, USA

<sup>2</sup>Marine Science Institute, University of California Santa Barbara, CA, USA

<sup>3</sup>Bureau of Ocean Energy Management, Camarillo, CA, USA

<sup>4</sup>Channel Islands National Park, Ventura, CA, USA

\* Corresponding Author

Email: [zjgold@ucla.edu](mailto:zjgold@ucla.edu)

Phone: +1(310)-795-0020

¶ These authors contributed equally to this work.

## 28 **Abstract**

29 Surf zones are highly dynamic marine ecosystems that are subject to increasing anthropogenic  
30 and climatic pressures, posing multiple challenges for biomonitoring. Traditional methods such  
31 as seines and hook and line surveys are often labor intensive, taxonomically biased, and can be  
32 physically hazardous. Emerging techniques, such as baited remote underwater video (BRUV)  
33 and environmental DNA (eDNA) are promising nondestructive tools for assessing marine  
34 biodiversity in surf zones of sandy beaches. Here we compare the relative performance of beach  
35 seines, BRUV, and eDNA in characterizing community composition of bony (teleost) and  
36 cartilaginous (elasmobranch) fishes of surf zones at 18 open coast sandy beaches in southern  
37 California. Seine and BRUV surveys captured overlapping, but distinct fish communities with  
38 50% (18/36) of detected species shared. BRUV surveys more frequently detected larger species  
39 (e.g. sharks and rays) while seines more frequently detected one of the most abundant species,  
40 barred surfperch (*Amphistichus argenteus*). In contrast, eDNA metabarcoding captured 83.3%  
41 (30/36) of all fishes observed in seine and BRUV surveys plus 59 additional species, including  
42 13 that frequent surf zone habitats. eDNA approaches showed significantly higher sensitivity  
43 than seine and BRUV methods and more consistently detected 29 of the 30 (96.7%) jointly  
44 observed species across beaches. The six species detected by BRUV/seines, but not eDNA either  
45 lacked reference sequences, were only resolved at higher taxonomic ranks (e.g. *Embiotocidae*  
46 surfperches), or were detected below occupancy thresholds. Low site-species overlap between  
47 methods limited comparisons of richness and abundance estimates, highlighting the challenge of  
48 comparing biomonitoring approaches. Despite potential for improvement, results overall  
49 demonstrate that eDNA can provide a cost-effective tool for long-term surf zone monitoring that

50 complements data from seine and BRUV surveys, allowing more comprehensive surveys of  
51 vertebrate diversity in surf zone habitats.

52

## 53 **Introduction**

54 Sandy beaches and their adjacent surf zones comprise ~30% of the world's ice-free shoreline  
55 [1,2]. Surf zones provide critical ecosystem services, supporting local marine biodiversity  
56 through the provisioning of forage habitat, refuge from predators, spawning sites, and nurseries  
57 for commercially and recreationally important fish species [2–5]. Furthermore, sandy beaches  
58 and surf zones are important areas for recreation and tourism [3,6,7]. In California alone, the  
59 value of sandy beach ecosystem services in 2017 was estimated at \$25.9 billion annually [6,8,9].

60         Despite their tremendous societal and ecological value, our understanding of the status,  
61 and spatial and temporal dynamics of surf zone fish communities in southern California and  
62 around the world is lacking [1], and sandy beaches and surf zones are rarely included in  
63 conservation management plans [10]. Sandy beaches and associated surf zone biological  
64 communities face both local and global anthropogenic stressors that threaten their biodiversity  
65 and ecosystem function [11]. Sea-level rise coupled with coastal armoring is contributing to  
66 coastal squeeze, compressing or eliminating sandy beaches and altering surf zone habitats [12–  
67 15]. Coastal urban development and engineering are increasing erosion along shorelines,  
68 increasing turbidity and altering surf zone characteristics [16–18]. Compounding these stressors,  
69 pollutants from stormwater, sewage, oil spills, and agricultural runoff often spill directly into surf  
70 zone habitats [11]. As urban development and climate change continues to impact these  
71 important coastal ecosystems, our ability to effectively manage sandy beaches hinges on accurate  
72 assessments and monitoring of the species and communities that depend on them [11,19].

73 Traditional methods for monitoring surf zone ecosystems are based on surveys using  
 74 nets, such as seines or bottom trawls, or hook and line fishing to capture surf zone fish [1,3,20].  
 75 Net, and hook and line surveys are advantageous as they can provide detailed information on  
 76 size, sex, and age structure of fish populations, and are not influenced by poor underwater  
 77 visibility. However, these capture surveys have known biases that limit their reliability and  
 78 repeatability. Hook and line fishing surveys are often species-specific due to the choice of tackle  
 79 and bait, and observer skill affects capture rates [21]. Wave and weather conditions can affect  
 80 seine surveys by reducing the capture efficiency of nets and creating hazards to researchers in  
 81 heavy surf (Table 1). Seines are also sensitive to slight variation in mesh size, width of opening,  
 82 and speed of implementation, impacting repeatability and comparability of results [10,22].  
 83 Seines are also less effective for sampling large, fast-moving species [23,24] as well as small  
 84 benthic fishes, such as flatfish (Families Pleuronectidae and Paralichthyidae), that pass through  
 85 or under the nets. In addition, both these techniques are highly labor-intensive, and can be  
 86 destructive, often injuring or killing captured specimens [25] (Table 1).

87 **Table 1. Comparisons of Survey Methods**

| <b><i>Metric</i></b>                       | <b>Beach Seine</b>                                       | <b>BRUV</b>                       | <b>eDNA</b>                                                                                             |
|--------------------------------------------|----------------------------------------------------------|-----------------------------------|---------------------------------------------------------------------------------------------------------|
| <b><i>Team size needed</i></b>             | 4-6                                                      | 2                                 | 2                                                                                                       |
| <b><i>Set up and Field time</i></b>        | 20 minutes per seine, 20-85 minutes to measure & release | 1.5 to 2.0 hours                  | 20 minutes                                                                                              |
| <b><i>Field Gear required</i></b>          | Seine, poles, lines                                      | Weighted video rigs, bait         | Sampling bags, filters, ice chest                                                                       |
| <b><i>Field Sample processing</i></b>      | Minimal, gear clean up and repair                        | Minimal, gear clean up and repair | ~1.5 hours for gravity filtering and preserving samples                                                 |
| <b><i>Post-Field Sample Processing</i></b> | None                                                     | 1.5-3.0 hours per video           | 12-24 hours per sample (DNA extraction, PCR, Library preparation, sequencing), but can be automated and |

|                                  |                                              |                                 |                                                                         |
|----------------------------------|----------------------------------------------|---------------------------------|-------------------------------------------------------------------------|
|                                  |                                              |                                 | optimized for high throughput                                           |
| <b>Sample Archiving</b>          | No – fish released                           | Yes – video record              | Yes – DNA extractions archived & sequence record                        |
| <b>Abundance</b>                 | Relative                                     | Relative                        | Relative (needs ground truthing)                                        |
| <b>Size and age distribution</b> | Yes                                          | No                              | No                                                                      |
| <b>Injury/mortality of fish</b>  | A small percentage of catch                  | No                              | No                                                                      |
| <b>Effect of sea conditions</b>  | Significant- affects net behavior and safety | Significant- affects visibility | Wider tolerance but unknown effects on spatial and temporal variability |

88

89 Alternative surf zone biomonitoring approaches rely on visual surveys, either via SCUBA

90 or snorkel transects or baited remote underwater video (BRUV) units [1,26,27]. BRUVs are

91 increasingly used to overcome diver avoidance behavior [20,28–30], instead employing baited

92 video cameras that record fish passing through the field of view, allowing for non-invasive

93 measurements of fish diversity, abundance, and behavior. However, BRUV surveys also have

94 biases that limit their reliability and repeatability (Table 1). Large waves, inclement weather,

95 light conditions, and drifting macrophytes, can all reduce visibility and impair species

96 identification and detection [31,32]. BRUV methods are also sensitive to bait choice, length and

97 location of deployment [10,22], may not attract planktrophic and herbivorous fish that are not

98 attracted to the bait, and are poor at detecting cryptic species [22]. Moreover, they are

99 challenging to deploy by kayak or swimming in the surf zone, and can require processing of

100 hundreds of hours of underwater video [27]. Together, these limitations affect the reliability and

101 effectiveness of visual monitoring approaches of surf zone fish communities, highlighting the

102 need for new approaches.

103           A promising new approach for surveying the diversity of coastal marine ecosystems is  
104 environmental DNA (eDNA) metabarcoding [33,34]. eDNA refers to the collection, capture,  
105 sequencing, and identification of DNA from recently dissociated cells of organisms inhabiting a  
106 particular ecosystem [35,36]. Studies indicate that eDNA metabarcoding is highly sensitive and  
107 provides an accurate, practical, and cost-effective method of monitoring marine biodiversity [37–  
108 41].

109           Studies of eDNA highlight some key advantages relative to seining and BRUVs (Table  
110 1). In particular, eDNA identifies a broad diversity of marine life, frequently detecting more  
111 species than other methods [42–45], including cryptic, rare, invasive, and endangered species  
112 [46–50], and is effective across a variety of marine ecosystems, including coral reefs [51,52],  
113 kelp forests [53], estuaries [31,54], and coastal oceans [37,55,56]. eDNA is largely independent  
114 of developmental stage, allowing for the detection of larval and juvenile life stages, identifying  
115 potential nursery grounds [34]. In addition, eDNA samples are simple to collect, encouraging  
116 citizen and community science, and are also cost effective, permitting increased sampling efforts  
117 across both time and space [34,57–59].

118           Yet eDNA also has limitations. For example, the need for molecular expertise and  
119 laboratory space to process samples may limit some research groups and monitoring agencies  
120 where such resources are not already available [41]. Additionally, eDNA does not provide key  
121 information needed for fishery and stock assessments (e.g., size, age, sex), and it is unclear  
122 whether eDNA results accurately reflect the relative abundance of marine species [31,40,60,61].

123           There are also unresolved questions about the fate and transport of eDNA, particularly in  
124 highly dynamic coastal marine ecosystems. For example, previous studies report spatial  
125 resolution of eDNA in nearshore marine environments is on the scale of 50-1000 m [53,62–65]

126 and temporal resolution is on the scale of hours to days [66–68], complicating the ecological  
127 interpretation of detected community assemblages [62,68–73]. However, these studies were not  
128 conducted in surf zone ecosystems which are strongly affected by wave driven longshore  
129 transport and nearshore currents with higher velocities (e.g., rip currents) and tides compared to  
130 the subtidal ecosystems previously studied, potentially integrating ecological signatures over  
131 greater space and time, and mixing species detections across ecosystems [1].

132 Although eDNA and BRUV surveys hold promise for monitoring surf zone habitats,  
133 evaluating how well these methods perform compared to traditional seine surveys and each other  
134 is a crucial information gap [27,74,75]; to date, only two studies [73,76] employed eDNA to  
135 assess fish biodiversity in surf zones habitats. To address this gap, we compared the ability of  
136 seine, BRUV, and eDNA methods to describe surf zone fish communities using a series of  
137 surveys where we simultaneously employed all three methodologies at 18 open coast surf zones  
138 associated with beaches in southern California. We compared these results to assess how the  
139 different survey methods performed in surf zone habitats, information critical to resource  
140 managers charged with monitoring these important coastal ecosystems.

141

## 142 **Methods**

### 143 *Study Sites*

144 To compare the effectiveness of seine, BRUV, and eDNA survey techniques for monitoring surf  
145 zone bony (teleost) and cartilaginous (elasmobranch) fish communities, we deployed the three  
146 survey techniques contemporaneously at 18 sandy beach sites across southern California, USA  
147 (Figure 1; Table S1); 14 on the California Channel Islands and 4 on the mainland. These  
148 represent novel fish community surveys for all but three of the mainland sites, providing

149 important baseline data for fish assemblages. To maximize comparability, we surveyed surf  
150 zones using all three methods at each location on the same day using the methods described  
151 below. All surveys were conducted between August 15, 2018 and November 2, 2018. At one  
152 site, Soledad beach, on Santa Rosa Island, we were unable to conduct the BRUV surveys due to  
153 hazardous surf conditions.

154 **Fig 1. Site Map. A) The entire study region. B) Northern Channel Islands. C)**

155 **Catalina Island**

156 Map of the (A) study region showing mainland sites, (B) Northern Channel Islands sites,  
157 (C) Catalina Island sites on the coast of southern California, USA. Black dots and  
158 numbers correspond to site names. 1 – Dangermond, 2 – R Beach, 3 – Santa Claus, 4 –  
159 Santa Monica, 5 – Cuyler Harbor, 6 – Sandy Point, 7 – Soledad, 8 – Bechers Bay, 9 –  
160 Water Canyon, 10 – Southeast Anchorage, 11 – Ford Point, 12 – China Camp, 13 –  
161 Forney Cove, 14 – Christy Beach, 15 – Coches Prietos, 16 – Emerald Bay, 17 – Little  
162 Harbor, 18 – Ben Weston.

163

164 *Beach seine surveys*

165 Beach seine surveys were employed using methods modified from the California Department of  
166 Fish and Wildlife (Monterey, CA, USA) [20] using a 15.3 m (50 ft) x 1.8 m (6 ft) seine net (10  
167 mm knotless nylon mesh, 2 m poles, 20 m leader ropes) with a bag, floats, and weighted lead  
168 line. At each site, we conducted seine hauls in the surf zone at four locations spaced haphazardly  
169 along the beach. For each seine haul, two researchers opened the beach seine parallel to shore in  
170 approximately 1.5 m of water. Keeping the weighted line flush with the bottom, we dragged the  
171 seine perpendicular to the shoreline until reaching the beach. Fish were then immediately  
172 removed from the seine, placed in aerated 1 m x 0.5 m x 0.5 m live wells, identified, enumerated,  
173 measured (total and standard length) on glazed (smooth) fish boards, and released alive at the site  
174 of capture in accordance University of California Santa Barbara's Institutional Animal Care and  
175 Use (IACUC) protocol #943. Any fish that appear to be severely injured, moribund, or that did  
176 not recover from the stress of trapping were euthanized using Tricaine methanesulfonate (MS-



177 222), a non-inhaled agents approved in the “AVMA Guidelines for the Euthanasia of Animals:  
178 2013 Edition” for finfish [77].

179

#### 180 *Baited remote underwater video (BRUV) surveys*

181 We conducted BRUV surveys following methods modified from Vargas-Fonseca et al. [78] and  
182 Borland et al. [26]. Each BRUV consisted of a GoPro Hero2 camera (GoPro Inc., San Mateo,  
183 California, USA, 2020) mounted on a five kg weight with a line and float attached for ease of  
184 retrieval. We then attached a bait bag containing ~152 g of frozen squid (*Loligo* sp.) to the  
185 weight with a PVC pipe, positioning it one meter in front of the camera. Snorkelers deployed  
186 three haphazardly spaced BRUV units along the outer edge of the surf zone at a depth of greater  
187 than two meters within two hours of low tide after conducting sein hauls, except for at sites  
188 where sufficient personnel allowed for concurrent sampling. We deployed each BRUV for one  
189 hour, producing three hours of video per beach. We reviewed videos to determine fish  
190 abundance, species richness, and community composition, using the *MaxN* statistic, the  
191 maximum number of individuals of one species in one frame during the hour-long footage [79].

192

#### 193 *Environmental DNA (eDNA) surveys*

194 We collected three replicate 0.5 L samples of seawater (herein referred to as sample replicates)  
195 using sterile collapsible enteral feeding bags. We then gravity filtered samples through 0.2 µm  
196 Sterivex filters following the methods of Gold et al. [80] (See Supplement for detailed  
197 description), storing filters at -20°C prior to extraction via a modified Qiagen DNAeasy Blood  
198 and Tissue kit (Qiagen Inc., Germantown, MD, USA) [81]. We amplified eDNA samples in  
199 triplicate using both *I2S* MiFish Universal teleost (MiFish-U) and elasmobranch (MiFish-E)

200 primer sets [82], and then prepared sequencing libraries preparation followed Gold et al. [80]  
201 using Nextera Unique Dual Indices (Illumina, San Diego, CA, USA). We pooled all samples in  
202 equimolar concentrations by primer set, resulting in a MiFish-U and a MiFish-E library which  
203 were separately sequenced on NextSeq PE 2 x 150 bp mid-output at the Technology Center for  
204 Genomics & Bioinformatics at the University of California – Los Angeles (UCLA) with 20%  
205 PhiX added to both sequencing runs.

206

### 207 *eDNA bioinformatics*

208 We processed the resulting eDNA metabarcoding sequences using the *Anacapa Toolkit* (version  
209 1) [83], conducting quality control, amplicon sequence variant (ASV) parsing, and taxonomic  
210 assignment. Taxonomy was assigned using a curated reference database composed of fishes from  
211 the California Current Large Marine Ecosystem following Gold et al. [80] (See detailed  
212 description in Supplement). The resulting taxonomic tables were transferred into *R* for further  
213 processing [84]. We employed a multifaceted decontamination approach developed by Kelly et  
214 al. (2018) to remove field contamination, lab contamination, and index hopping [71,85–87]. We  
215 then summed the total reads of ASVs by assigned taxonomy including multiple ASVs from the  
216 two MiFish markers employed. From these processes, we obtained decontaminated eDNA  
217 species-by-sample community tables with counts of total sequence reads.

218 We transformed the eDNA read counts into eDNA index scores according to Kelly et al.  
219 [71], which normalizes the read count per technical PCR replicate per species. This index was  
220 computed by first calculating the relative abundance of each species in each technical PCR  
221 replicate. The relative abundance was then divided by the maximum relative abundance for a

222 given species across all samples, yielding the eDNA index score, which ranges from 0 to 1 and  
223 allows for comparisons of relative abundance for specific taxa across samples.

224

225

## 226 *Data analysis*

227 To explore the relative efficacy of seines, BRUV, and eDNA surveys for characterizing surf zone  
228 fish communities, we compared the total number of teleost and elasmobranch species identified  
229 by each method using the *phyloseq* (version 1.28.0) and *vegan* packages (version 2.5-7) [88,89]  
230 in *R* (version 3.6.1, R Core Team 2020). Comparisons were made in two ways: 1) all detected  
231 fish taxa and 2) only surf zone fish taxa. Surf zone taxa were determined using habitat  
232 descriptions from FishBase.org and the literature [3,90,91] (Table S2). We determined and  
233 visualized the overlapping and unique fish species detected by each survey method across all 18  
234 sites using the *VennDiagram* package (version 1.6.20) [92], comparing species richness of each  
235 method using Analysis of Variance (ANOVA) and post-hoc Tukey tests using the *vegan* package  
236 [89].

237 To examine survey method performance on a site-by-site basis, we calculated and  
238 compared the overlap of presence/absence site-species detections [84,93,94]. Here, we define a  
239 site-species detection as the detection of a species at a given site (e.g., Top smelt detected at  
240 Bechers Bay). Comparisons of site-species detections were conducted for both the surf zone  
241 fishes and all fishes, observed by seine, BRUV, and eDNA, respectively. We estimated sample  
242 coverage, the fraction of the total incidence probabilities of the discovered species for a set of  
243 sampling units, from rarefaction and extrapolation models for species richness (Hill number  $q=0$ )  
244 for each method using the *iNext* package (version 2.0.20) [95].

245 To determine whether the presence or absence of a species is a true reflection of  
246 biological reality or due to issues in the sampling process [96,97], we also conducted a site-  
247 occupancy analysis of species detections at each site following the methods of Chambert et al.  
248 [87] as implemented by Kelly et al. [98]. The binomial model yields the likelihood that a taxon  
249 detected is truly present in the sample. The model, implemented in Stan for *R* (version 2.2.12;  
250 [100]), depends upon three parameters: 1) the commonness of a taxon in the dataset (denoted  
251  $P_{si}$ ), 2) the probability of a detection given that the taxon is truly present (true positive detection;  
252 denoted  $P_{11}$ ), and 3) the probability of a detection given that the taxon was not truly present  
253 (false positive; denoted  $P_{10}$ ). The probability of occurrence function used was the following:

$$254 \quad \text{Probability of Occurrence} = \frac{p_{si} * p_{11}^N * (1 - p_{11})^{K-N}}{p_{si} * p_{11}^N * (1 - p_{11})^{K-N} + (1 - p_{si}) * p_{10}^N * (1 - p_{10})^{K-N}}$$

255 Where  $K$  is the number of samples taken within a site and  $N$  is the number of species  
256 detections within a site (See Supplemental methods for detailed description). For each species we  
257 calculated the number of detections out of the number of replicate surveys taken at each site. The  
258 occurrence of either a single sequence or single individual for one species in a given replicate  
259 was treated as a detection at that site.

260 In addition to probability of occurrence we also calculated the mean sensitivity, the  
261 proportion of true positive detections correctly identified as positive using the following equation  
262 for each species:

$$263 \quad \text{Sensitivity} = \frac{p_{11}}{p_{11} + p_{10}}$$

264 We also calculated the mean specificity, the proportion of true negative detections correctly  
265 identified as negative, using the following equation for each species:

266 
$$\text{Specificity} = \frac{1 - p_{10}}{(1 - p_{10}) + (1 - p_{11})}$$

267 We then compared the probability of occupancy, mean sensitivity, and mean specificity  
268 of each method across all species detected [101]. We further compared differences in the eDNA-  
269 derived probability of occurrence of surf zone and non-surf zone associated species to test if  
270 occupancy rates are a potential function of transport dynamics.

271 To analyze differences in the composition of surf zone fish detected among methods and  
272 across sites, we conducted a PERMANOVA and companion multivariate homogeneity of group  
273 dispersions on Jaccard-Binary dissimilarity indices based on presence/absence data using the  
274 *adonis* and *betadisper* functions in the *vegan* package [89]. The PERMANOVA was conducted  
275 using the following model:

276 
$$\text{Detection} \sim \text{Survey Method} + \text{Site}.$$

277 We excluded the Soledad site on Santa Rosa Island given the lack of a BRUV survey. We further  
278 visualized community beta diversity among sampling methods using a constrained canonical  
279 analysis of principal components (CAP) through the *vegan* package [84,88].

280 Lastly, to assess the ability of eDNA to capture relative abundance, we compared mean  
281 eDNA index scores to both the average catch counts per seine as well as average *MaxN* counts  
282 per BRUV station using species-specific linear regressions. Similarly, we compared BRUV-  
283 derived average *MaxN* counts against average seine counts. We focused our analyses on species  
284 detected jointly by each method at three or more sites.

285

## 286 **Results**

287 Our beach seine surveys captured a total of 1,359 individuals in 72 hauls across all sites (4 hauls  
288 per site). Seven of the 72 hauls produced 0 individuals. In total, seining detected 24 species of

289 fish from 24 genera, 13 families, and two classes (Table S3). On average, we captured 4.0  
290 species ( $\pm 2.5$  standard deviation, range 0-9), and  $75.5 \pm 82.8$  individuals per site (range 0-325  
291 individual fishes).

292 Our BRUV surveys detected a total of 1,114 individual fishes in 51 BRUV deployments  
293 (3 replicate deployments per site). In total, BRUV surveys detected 30 species, 30 genera, 21  
294 families, and two classes (Table S4). An average of  $6.3 \pm 3.2$  species (range 2-16 species) and  
295  $65.5 \pm 65.5$  total individuals (range 13-236 individuals) were recorded per site.

296 Sequencing of the 54 eDNA samples yielded a total of 4,839,336 MiFish elasmobranch  
297 reads and 16,835,503 MiFish teleost reads that passed the initial NextSeq quality controls across  
298 all samples. After decontamination and site occupancy modeling, we retained 3,638,292 reads  
299 and 908 ASVs from MiFish Elasmobranch primer set and 12,953,877 reads and 1,877 ASVs  
300 from MiFish Teleost primer set, representing 89 species of fish from 79 genera, 48 families, and  
301 two classes across sites. On average we observed  $34.4 \pm 12.3$  SD species per site (range 11-59  
302 species) (Figure S1).

303

#### 304 *Species assemblages characterized by each method*

305 We found variable agreement in the assemblages of species captured by each survey method  
306 across all 18 sites (Figures 2 & S2). Seine and BRUV captured distinct, but overlapping surf  
307 zone fish assemblages, sharing only 50% (18/36) of fishes species. Seine surveys detected 6  
308 species of fishes not observed in BRUV surveys, including 2 species of croakers (Family  
309 Sciaenidae), 2 species of surfperches (Family Embiotocidae), and two planktotrophic coastal-  
310 pelagic species (families Clupeidae and Atherinidae). In contrast, BRUV surveys detected 12

311 fish species not observed in seines, including 3 species of elasmobranchs, 6 species of rocky reef  
312 associated species, and 2 coastal-pelagic predator species.

313 **Fig 2. Venn Diagram of eDNA, Seine, and BRUV Species Detections.**

314 Environmental DNA methods captured the majority (30/36) of fish species detected by  
315 both BRUV and seine surveys, only failing to identify six fish species found in the other  
316 two survey methods. In addition eDNA identified 59 additional fish species missed by  
317 seine and BRUV methods. In contrast, BRUV and seine surveys only captured 50% of  
318 species detected by both methods, showing strong difference in the species detected by  
319 each method. This was largely driven by the unique detection of elasmobranchs as well  
320 as nearshore pelagic and rocky reef carnivorous fishes in BRUV surveys compared to the  
321 unique detection of surfperches (Family Embiotocidae), grunts (Family Sciaenidae), and  
322 planktivorous nearshore pelagic species in seine surveys.

323  
324

325 In contrast, eDNA detected the majority (83.3%, 30 out of 36) of species found in seine  
326 and BRUV surveys (Figure 2). Similarly, when only focusing on surf zone fish (Table S2),  
327 eDNA detected 83.3% (25 out of 30) of species detected in seine and BRUV surveys (Figure  
328 S2). eDNA methods failed to detect six species found in the seine and BRUV surveys including  
329 three species of surfperch, the most abundant and widespread family (*Embiotocidae*) detected in  
330 the seine surveys. Undetected species include the walleye surfperch (*Hyperprosopon*  
331 *argenteum*), silver surfperch (*Hyperprosopon ellipticum*), barred surfperch (*Amphistichus*  
332 *argenteus*), white seabass (*Atractoscion nobilis*), kelp pipefish (*Syngnathus californiensis*), and  
333 the soupfin shark (*Galeorhinus galeus*). However, eDNA surveys detected 59 fish species not  
334 detected in seine or BRUV surveys (Table S5 & S6), including 13 surf-zone associated species  
335 and 46 species more typically associated with reef and pelagic habitats (Table S2). Thus, eDNA  
336 had high overlap with both BRUV and seine surveys in addition to capturing additional surf zone  
337 and nearshore marine fishes.

338 Composition of detected taxa varied significantly among survey methods (Figures 3 and  
339 S3; CAP ANOVA  $p < 0.001$ ) driven by biases in detection of specific taxa. Seines and BRUVs

340 commonly detected barred surfperch (*Amphistichus argenteus*), whereas eDNA only could not  
341 resolve surfperches below family level. Similarly, eDNA and BRUV surveys more frequently  
342 detected leopard shark (*T. semifasciata*), California bat ray (*M. californica*), and kelp bass  
343 (*Paralabrax clathratus*) compared to seine surveys. In contrast, eDNA detected many more  
344 species than BRUVs or seines, including opaleye (*Girella nigricans*), Pacific sardine (*Sardinops*  
345 *sagax*), northern anchovy (*Engraulis mordax*), giant kelpfish (*Heterostichus rostratus*),  
346 California grunion (*Leuresthes tenuis*), dwarf perch (*Micrometrus minimus*), and black surfperch  
347 (*Embiotica jacksoni*) (Figure 3).

### 348 **Fig 3. Constrained Analysis of Principal Components**

349 Constrained Analysis of Principal Components (CAP) analysis was conducted on Jaccard  
350 binary dissimilarities of fish assemblages of all species detected across surveys. Survey  
351 method explained 41.5% of the total variation observed in the composition of detected  
352 taxa while site explained an additional 28.8% (PERMANOVA  $p < 0.0001$ ). We found no  
353 significant difference in homogeneity of dispersions across sites (betadisper  $> 0.05$ ).  
354 BRUV and eDNA approaches more frequently detected leopard sharks (*Triakis*  
355 *semifasciata*) and California bat ray (*Myliobatis californica*) compared to seine surveys.  
356 Both seine and BRUV surveys detected Barred surfperch (*Amphistichs argenteus*) while  
357 eDNA methods could only achieve family level resolution for this taxon. eDNA  
358 approaches more consistently detected opaleye (*Girella nigricans*), northern anchovy  
359 (*Engraulis mordax*), giant kelpfish (*Heterostichus rostratus*), and dwarf perch  
360 (*Micrometrus minimus*).  
361

362 In total, survey method explained 41.5% of the total variation observed in the  
363 composition of detected taxa, while site explained an additional 28.8% (PERMANOVA  $p$   
364  $< 0.0001$ ). We found no significant difference in homogeneity of dispersions across methods or  
365 sites (betadisper  $> 0.05$ ) (Table S7). We also found similar differences in fish communities  
366 between survey methods when we limited our comparisons to only taxa observed by both visual  
367 and eDNA methods. Survey method explained 33.1% of the total variation observed in the  
368 composition of detected taxa, while site explained an additional 33.6% (PERMANOVA ,  $p <$



369 0.001). However, eDNA had significantly lower dispersion than seines across all sites  
370 (homogeneity of dispersions  $p=0.002$ ) (Table S8).

371

#### 372 *Detection rates of species across methods*

373 Detection rates of species also differed significantly among survey methods (Figure 4 & S4-S7)  
374 with eDNA having a significantly higher sensitivity (98.5%) than both seine (96.7%) and BRUV  
375 (96.2%) surveys across all taxa (ANOVA,  $p < 0.0001$ ). Likewise, eDNA had significantly higher  
376 probability of occupancy (45.8%) at the site level than both seine (24.9%) and BRUV (28.6%)  
377 surveys (ANOVA,  $p < 0.0001$ ) as well as having significantly higher specificity (71.0%) than  
378 seines (66.4%) (ANOVA,  $p = 0.01$ ). However, we observed no difference in specificity between  
379 BRUV (69.1%) and eDNA or seine surveys at the site level (ANOVA,  $p > 0.5$ ) (Figure 5).  
380 Furthermore, we found that eDNA methods had significantly higher probability of occupancy for  
381 species known to inhabit surf zone habitats (52.7%) than non-surf zone associated species  
382 (40.2%) (ANOVA,  $p=0.011$ ) (Figure S8).

#### 383 **Fig 4. Heatmap of surf zone fishes jointly detected between surveys**

384 Teleost species in black font and elasmobranch species in blue font. Environmental DNA  
385 approaches more frequently detected 24 of 25 species detected by either BRUV or seine  
386 surveys. Only Leopard shark *Triakis semifasciata* was more frequently detected by  
387 BRUV surveys.

388

#### 389 **Fig 5. Probability of Occupancy, Specificity, and Sensitivity of eDNA, Seine, and** 390 **BRUV surveys**

391 Environmental DNA surveys had higher probability of occupancy and sensitivity than  
392 BRUV and seine surveys. eDNA had significantly higher specificity than seine surveys.  
393 We found no difference in specificities between BRUV and eDNA and seine surveys.  
394 Probability of occurrence is a measure of how likely a species is present at a site as a  
395 function of the commonness of the species as well as the true positive and false positive  
396 detection rates of the method surveyed. Sensitivity is the proportion of true positive  
397 species detections correctly identified as true positive detections. Specificity is the  
398 proportion of true negative species detections identified as negative detections.

399

400           The three methods yielded different levels of detection both overall and of individual  
401 species of surf zone fish. Our eDNA samples more consistently detected 96.7% (29/30) of all  
402 species jointly observed by either BRUV or seines. However, seine surveys more frequently  
403 detected barred surfperch (*Amphistichus argenteus*) and walleye surfperch (*Hyperprosopon*  
404 *argenteum*) than eDNA and BRUV surveys. Seine surveys also more frequently detected  
405 California corbina (*Menticirrhus undulatus*), northern anchovy (*Engraulis mordax*), giant  
406 kelpfish (*Heterostichus rostratus*), and kelp pipefish (*Syngnathus californiensis*) than BRUV  
407 surveys, but not for eDNA surveys. Our BRUV surveys detected elasmobranchs and flatfishes  
408 (Families Pleuronectidae and Paralichthyidae) more frequently than seine surveys. Leopard shark  
409 (*Triakis semifasciata*) was the only species more frequently detected with BRUV (15/18) than  
410 eDNA methods (14/18). In total, eDNA only failed to detect five species observed in seine  
411 surveys at a single site: round stingray (*Urobatis helleri*), California grunion (*Leuresthes tenuis*),  
412 black surfperch (*Embiotoca jacksoni*), dwarf perch (*Micrometrus minimus*), and giant kelpfish  
413 (*Heterostichus rostratus*). Likewise, eDNA only failed to detect three species observed with  
414 BRUV: leopard shark (*Triakis semifasciata*) and speckled sanddab (*Citharichthys stigmaeus*) at  
415 two sites and California bat ray (*Myliobatis californica*) at one site.

416           Across all sites, eDNA had higher sample coverage estimates (98.9%) than both BRUV  
417 (89.6%) and seine (85.2%) surveys (Figure 6). From species rarefaction curves of all species  
418 surveyed at the site level, we estimate that both BRUV and seine surveys would have to be  
419 conducted at more than 100 sites to achieve similar sample coverage estimates as eDNA at the  
420 18 sites surveyed here. However, within each site surveyed, we found no significant differences  
421 in sample coverage estimates between methods (seine mean = 92%, BRUV mean = 91.6%,  
422 eDNA mean = 90.3%; ANOVA,  $p > 0.05$ , Table S9).

423 **Fig 6. Sample Coverage Estimates of eDNA, Seine, and BRUV surveys**  
424 Across all sites, environmental DNA surveys had an estimate sample coverage of 98.9%,  
425 higher than the sample coverage of BRUV (89.6%) and seine (85.2%) surveys. Shaded  
426 area represents 95% confidence intervals. Sample rarefaction curves across sites suggest  
427 BRUV and seine surveys would have to be conducted at more than 100 sites to achieve  
428 similar sample coverage estimates to eDNA surveys conducted at the 18 sites surveyed  
429 here.

430  
431 *Comparisons of relative abundance among survey methods*

432 Estimates of relative abundance varied significantly among the three survey methods and were  
433 generally not correlated. We found a significant positive relationship between BRUV *MaxN*  
434 values and seine counts ( $R^2 = 0.31$ ,  $p = 0.032$ , Table S10, Figure S9) for only one species,  
435 topsmelt (*Atheriniops affinis*). Likewise, there was a significant positive relationship between  
436 seine counts and eDNA index scores for only two species, topsmelt,  $R^2 = 0.32$ ,  $p = 0.014$ , Table  
437 S11, Figure S10), and California corbina, *Menticirrhus undulatus* ( $R^2 = 0.82$ ,  $p < 0.001$ , Table  
438 S11). Similarly, there was a significant positive relationship between BRUV *MaxN* and eDNA  
439 index for only three species (kelp bass, *Paralbrax clathratus*, shovelnose guitarfish, *Psuedobatos*  
440 *productus*, and round stingray *Urobatis halleri*) (respective  $R^2$ : 0.45, 0.41, and 0.94,  $p < 0.005$ ,  
441 Table S12, Figure S11).

442

## 443 **Discussion**

444 Despite extreme methodological differences, seine, BRUV, and eDNA surveys captured largely  
445 overlapping, but distinct fish assemblages in surf zone habitats with notable taxonomic biases.  
446 Seines more consistently detected surfperches, including the most abundant fished species,  
447 barred surfperch (*Amphistichus argenteus*) while BRUV surveys efficiently revealed larger  
448 predatory species, particularly elasmobranchs as previously documented [102]. eDNA captured  
449 the highest species richness of all three methods, including the majority of species detected by

450 seine and BRUV surveys (30/36). The mismatch in fish assemblages sampled by each method  
451 made comparisons of relative abundance difficult, highlighting a key challenge of comparing  
452 survey methods [44].

453       Importantly, similar to other studies (see Bakker et al. 2017a, Boussarie et al. 2018, Stat  
454 et al. 2019, Cole et al. 2021, Fedajevaite et al. 2021, Mirimin et al. 2021), we found that eDNA  
455 analysis had higher sensitivity than the two traditional methods, and more frequently detected  
456 nearly all jointly observed species at a given site. Our results suggest that seine, BRUV, and  
457 eDNA approaches are complementary and their use in tandem provides the most accurate  
458 characterization of surf zone fish communities. Recent studies using two of these three methods  
459 reached similar conclusions [102,106].

460

461 *Species assemblages characterized by each method*

462 Only half of fish species detected by seine and/or BRUV surveys overlapped (18/36) indicating  
463 that these methods target different species assemblages. Compared to BRUV surveys, seine  
464 surveys captured additional surfperches and croakers associated with surf zone habitats as well  
465 as planktivorous coastal pelagic species. In contrast, BRUV surveys detected a greater number of  
466 elasmobranch and rocky reef species, particularly carnivores and scavengers, suggesting that fish  
467 are attracted from adjacent habitats to the bait, or our current understanding of species' surf zone  
468 habitat utilization is limited. Combined, our results align well with previous findings from  
469 tropical shorelines indicating that BRUV and seines capture distinct, but overlapping fish  
470 assemblages in surf zone habitats [102].

471       Our finding that eDNA approaches detected 83% (30 out of 36) of fish species observed  
472 using seine and BRUV methods, with higher overlap in detected fish assemblages. Importantly,

473 eDNA approaches also captured an additional 13 surf zone species not observed by our seine or  
474 BRUV methods, including the federally listed northern tidewater goby (*Eucyclogobius*  
475 *newberryi*) and commercially-fished species of management concern, such as the flathead grey  
476 mullet (*Mugil cephalus*), black croaker (*Cheilotrema saturnum*), white croaker (*Genyonemus*  
477 *lineatus*), and Pacific sanddab (*Citharichthys sordidus*) (Allen & Pondella, 2006). Furthermore,  
478 eDNA detected a wide array of elasmobranchs that are typically underrepresented in most  
479 traditional sampling approaches [103,109–111] including angel shark (*Squatina californica*),  
480 horn shark (*Heterodontus francisci*), California butterfly ray (*Gymnura marmorata*), and  
481 broadnose sevengill shark (*Notorynchus cepedianus*). As such, eDNA should be viewed as a  
482 valuable complement both seine and BRUV surveys.

483         The failure of eDNA to detect six common species captured by seine and BRUV surveys  
484 was predominantly due to the limitations of the 12S MiFish-U primers, particularly for the  
485 surfperches, and associated reference databases [80]. Specifically, *Embiotocidae* is a diverse,  
486 recent radiation [112] and the MiFish-U primers perform poorly in such cases, such as rockfish  
487 in the genus *Sebastes* [113]. Failure to detect three of six surfperch species is likely a result of  
488 insufficient genetic variation within the 12S gene region bounded by the MiFish 12S primer set,  
489 leading to many surfperches only being resolved at higher taxonomic ranks (e.g. *Embiotocidae*)  
490 [80]. Importantly, we note all three species had corresponding 12S reference barcodes [80]  
491 which were nearly identical. In contrast, White seabass (*Atractoscion nobilis*) lacks a MiFish-U  
492 barcode and thus could not be resolved given incomplete reference databases [80].

493         However, two of the six species, soupfin shark (*Galeorhinus galeus*) and kelp pipefish  
494 (*Syngnathus californiensis*), were detected with eDNA approaches but below the occupancy  
495 thresholds required to be considered a positive detection. We note that these species were

496 detected in the seine and BRUV surveys, but very rarely (soupfin shark BRUV n=1; kelp  
497 pipefish BRUV n=1, seine n=5 individuals). Likewise, eDNA methods only detected 790 total  
498 reads of soupfin shark species across all sites. However, we at most observed 56 reads in one  
499 technical replicate where it was observed in BRUV footage - below our occupancy threshold of  
500 detection at a given site. Likewise, kelp pipefish was detected by eDNA, but again below our  
501 occupancy threshold. These low-threshold detections, corroborated here by more traditional  
502 methods, may justify adopting different threshold values for eDNA occupancy than employed  
503 here, particularly for species that are shown to shed small amounts of DNA or that have high  
504 eDNA degradation rates.

505 eDNA captured a strong signature of surf zone fish assemblages including an additional  
506 13 species of surf zone fishes not observed by seine and BRUV approaches, highlighting the  
507 utility of eDNA biomonitoring to improve estimates of total fish diversity in coastal monitoring  
508 surveys. eDNA also detected an additional 43 native coastal marine fishes not detected by our  
509 seine and BRUV surveys (Tables S5-6). Although many of these species are unlikely to inhabit  
510 surf zone habitats directly [114], our study beaches were adjacent to rocky reef kelp forests,  
511 rocky intertidal habitats, and estuaries. Our detections of additional native fish species highlight  
512 the capacity for movement of both fish and eDNA across pelagic and inshore habitats [62].  
513 Given the potential for transport on the scale of tens to thousands of meters, the detection of  
514 fishes from adjacent habitats in eDNA samples is to be expected [70], thus highlighting a  
515 potential shortcoming of eDNA approaches, and the need for better understanding of spatial and  
516 temporal variability in the dispersal of eDNA within and across ecosystems. Despite the need to  
517 better characterize the fate and transport of eDNA, our results still demonstrate that such eDNA  
518 approaches can be highly informative of surf zone communities as previously demonstrated [73],

519 particularly on longer open coast beaches that are not located adjacent to rocky subtidal or  
520 intertidal habitats.

521

### 522 *Detection rates of species across methods*

523 In addition to the differences in fish assemblages captured by each method, we found substantial  
524 differences in the detection frequency of jointly observed species across sites between these  
525 methods. Overall, we found that eDNA had higher frequency of detection of nearly all species  
526 (29/30) jointly detected by either of the seine and BRUV methods (Tables S5-6). This higher  
527 rate of detection also resulted in eDNA having significantly higher sensitivity than both seines  
528 and BRUV surveys. Furthermore, results from species rarefaction curves suggest that eDNA  
529 surveys capture a larger proportion of the total fish diversity across sites than seine and BRUV  
530 surveys, but that each method was deployed with sufficient replication within each site to capture  
531 the majority of fish diversity present. Importantly, our results strongly suggest that additional  
532 BRUV and seine surveys should be deployed across more sandy beach sites rather than  
533 additional deployments at the same site to maximize fish diversity across the region. In contrast,  
534 our results suggest that the current eDNA deployment of three sample replicates with three  
535 technical replicates was sufficient to adequately capture diversity across the region, providing a  
536 baseline sampling regime for future eDNA deployments for monitoring fish diversity in surf  
537 zone ecosystems.

538 One possible explanation for the differences in site-species detection frequency across  
539 methods is poor taxonomic resolution or erroneous assignment across methods. The *Anacapa*  
540 *Toolkit* provides confidence scores around each taxonomic rank of assignment, providing  
541 information on the accuracy of eDNA identifications [83]. However, such confidence scores are

542 not readily available for data from seine and BRUV surveys, where taxonomic identification  
543 depends on the presence of easily observed morphological characteristics and the resolution of  
544 video still captures. For example, topsmelt (*Atherinops affinis*) and California grunion (*Leurethes*  
545 *tenuis*) are morphologically very similar, with the potential for misidentification, particularly  
546 under low visibility conditions for BRUV surveys.

547         The variation in temporal and spatial scales sampled by each of the three survey methods  
548 may also drive differences in site-species detections [27,62,66–68,102,111]. Beach seines survey  
549 a small spatial area (here 15.3 m x 1.8 m x 2m) at 0 to 1.5 m depth at a single instantaneous  
550 snapshot of sampling [3,31]. In contrast, BRUV units were deployed for an hour at 2-3 m depth  
551 and likely attracted species across tens to hundreds of square meters [27,102,105,111]. Although  
552 the spatial and temporal scales of eDNA methods in marine systems are still an active area of  
553 research, previous studies have found that eDNA integrates across spatial scales from 50 – 1,000  
554 meters and degrades *in situ* between 2 and 12 hours, although laboratory experiments suggest  
555 degradation rates on the order of days [53,62,67,68,73,115]. Thus the ecological integration time  
556 of each of these surveys is substantially different and likely contributes to the differences we  
557 observed in species detections [44,73].

558         Differences in species detection among methods are also likely driven by the dynamics of  
559 eDNA. eDNA shedding rates can vary among [116] and within species [117], driven by  
560 differences in physiology and behavior. Increased shedding rates result in higher eDNA  
561 detection probabilities, thus biasing which species are successfully detected within surf zone  
562 ecosystems. For example, eDNA methods have the potential to be biased during spawning events  
563 when high DNA concentrations are released [118]. Likewise, the interaction between high water



564 transport within and potentially variable degradation rates across species or environmental  
565 conditions (temperature, UV, etc.) could influence detection probabilities [66,69,119].

566 We found that eDNA captured a wide variety of species not typically associated with surf  
567 zone habitats, suggesting transport of eDNA from offshore and other intertidal habitats and some  
568 level of spatial integration of eDNA measurements. However, our finding that species known to  
569 inhabit surf zone habitats had significantly higher probability of occupancy than species known  
570 to associate with further offshore habitats, strongly suggests that detection is biased towards  
571 species recently inhabiting the surveyed surf zone habitat. This corroborates previous work  
572 finding that eDNA signatures were able to distinguish surf zone and adjacent subtidal kelp forest  
573 ecosystems from differences in fish assemblage composition as well as relative abundance  
574 estimates [73]. However, additional research on modeling eDNA dispersal and its dependence on  
575 transport and degradation in a range of habitats could allow modeled adjustment of eDNA data  
576 to account for these processes.

577

### 578 *Relative abundance*

579 Given the observed low site-species overlap among survey methods, assessing the capability of  
580 eDNA approaches to estimate relative abundance was challenging, particularly since eDNA  
581 surveys frequently detected a species at multiple sites where seine and BRUV surveys did not  
582 detect that species at all. This presents a core challenge of comparing eDNA to capture and  
583 visual surveys when the true abundance of species is unknown (Table 1) [44]. However, recent  
584 work from studies with greater survey overlap show promise for estimating relative abundance  
585 using eDNA approaches [31,40,60].

586           Given that the ability to estimate relative abundance is a function of the ability to detect a  
587 given species, our results suggest that eDNA approaches are more sensitive and better suited  
588 than capture and visual survey methods to estimate abundance [87,96,97]. This result, however,  
589 is highly dependent on the ability of eDNA approaches to resolve a given taxa. Here eDNA  
590 approaches using the MiFish-U primer set failed to resolve the most abundant surf zone species  
591 from both seine and BRUV surveys, the surfperches (Family Embiotocidae). Future work is  
592 needed using controlled mesocosm studies in which the true abundance of species is known, as  
593 well as field studies on tagged and intensively monitored populations to further determine the  
594 effectiveness of abundance estimation from eDNA metabarcoding [60]. Importantly, such studies  
595 should account for transport, residence time, and variation in species specific shedding and  
596 degradation rates of eDNA [119] as well as the role of amplification efficiency for biasing  
597 metabarcoding results [120,121].

598

### 599 *Choosing a survey method*

600 All survey methods have biases, and the more a particular survey method is used allows the  
601 determination of such biases. For example diver avoidance behavior is a well-established bias of  
602 visual SCUBA surveys [20,28–30]. Likewise, results of this study showed that each method had  
603 distinct advantages and disadvantages. BRUVs are more likely to capture large mobile species  
604 than seines, and eDNA captured more total diversity than BRUVs or seines. As such, method  
605 selection will largely be a function of the goals of a study, and whether detection of specific taxa  
606 or total diversity is a priority.

607           However, an important consideration when employing eDNA or BRUV data compared to  
608 seine surveys (without photographic documentation of hauls) is that the DNA sequences and

609 ASV tables generated by eDNA and the video footage produced by BRUVs are a permanent  
610 records of what was present at a particular time [34] (Table 1). For eDNA in particular, as  
611 reference databases are improved, eDNA sequence data can be reanalyzed to test for the  
612 presence of previously missed or poorly resolved taxa, e.g. surfperch. In addition, bio-archived  
613 eDNA samples or extractions can be revisited for future resequencing and management and  
614 biomonitoring applications (e.g., species invasions) [122]. The ability for future analyses of a  
615 given ecosystem at a specific time highlights the advantages of applying multiple approaches,  
616 where eDNA can provide robust and accurate taxonomic information that can be updated over  
617 time while carefully deployed stereo-video approaches (not deployed here given challenging surf  
618 conditions) and seine hauls can provide size structure and biomass estimates with demonstrated  
619 utility [27,102].

620

## 621 **Conclusion**

622 There is a growing need to survey threatened surf zone and beach ecosystems in the face of  
623 global change [11]. Our results suggest that seine, BRUV, and eDNA approaches are  
624 complementary techniques for surveying fish diversity in open coast surf zone habitats. eDNA is  
625 a relatively quick, effective, and nondestructive approach to surveying marine wildlife, compared  
626 to capture and visual surveys of dynamic surf zone habitat (Table 1). Given the cost effectiveness  
627 and ability to automate collection and processing, eDNA methods could provide an approach to  
628 increase the scope and scale of surf zone ecosystem monitoring across time and space [33,41].  
629 The ease of sample collection in this challenging habitat could allow researchers, marine  
630 resource managers, and community scientists to conduct surveys more frequently and in more  
631 places, better characterizing surf zone biodiversity and dynamics [25,57,58,123]. Furthermore,

632 the ability to archive eDNA samples for future use provides an important resource for  
633 comparative analyses of ecosystem change [34,122] and for making use of advances in reference  
634 libraries.

635 Although we demonstrated that eDNA provides more robust species detections in surf  
636 zone habitats, eDNA cannot provide information on sex ratios or population size structure that  
637 can be obtained from seine and BRUV surveys, information critical to resource management  
638 [1,3]. Thus, eDNA cannot be viewed as a wholesale replacement for other survey methods, but  
639 instead as a complementary tool for biomonitoring surf zone ecosystems [106]. Nevertheless,  
640 adding eDNA surveys to traditional monitoring programs or conducting them on their own when  
641 and where other methods are untenable has the potential to greatly enhance our knowledge of  
642 surf zone fish communities, providing a new source of comprehensive and detailed information  
643 needed for management and preservation of these vital coastal ecosystems in the face of global  
644 change.

645

## 646 **Acknowledgements**

647 We thank the Channel Islands National Park, The Nature Conservancy, UC Natural Reserve  
648 System, CSUCI Santa Rosa Island Field Station, USC Wrigley Institute and NOAA Channel  
649 Islands National Marine Sanctuary for access and use of facilities. We thank Laura Beresford,  
650 Francesca Puerzer, Justin Hoesterey, and Russel Johnson for their assistance in the field. We  
651 thank Beverly Shih, Nikita Sridhar and Lauren Man for their help in library preparation of eDNA  
652 samples.

653

## 654 **Data reporting**

655 All data, accession numbers, and code used to conduct analyses will be made publicly available  
656 on Dryad, NCBI, and GitHub upon acceptance of the manuscript.

657

## 658 **Financial Disclosure Statement**

659 Support was provided by the U.S. Department of Interior, Bureau of Ocean Energy Management  
660 (BOEM), Environmental Studies Program, Washington D.C. under Co-Op Agreement  
661 #M15AC00012, with additional support from the NASA Biodiversity and Ecological  
662 Forecasting Program (Grant NNX14AR62A), BOEM Agreement MC15AC00006, and the  
663 National Oceanic and Atmospheric Administration in support of the Southern California Bight  
664 Marine Biodiversity Observation Network (J.D. & R.J.M.). Additional support was provided by  
665 University of California CALeDNA summer internship (M.Q.K.), the Undergraduate Research  
666 Scholars Program at UCLA through the Holmes O. Miller Endowment Fund (M.Q.K.), and an  
667 HHMI Professor award (P.H.B.).

668

## 669 **References**

- 670 1. Olds AD, Vargas-Fonseca E, Connolly RM, Gilby BL, Huijbers CM, Hyndes GA, et al.  
671 The ecology of fish in the surf zones of ocean beaches: A global review. *Fish Fish.*  
672 2018;19: 78–89.
- 673 2. Luijendijk A, Hagenaaars G, Ranasinghe R, Baart F, Donchyts G, Aarninkhof S. The state  
674 of the world’s beaches. *Sci Rep.* 2018;8: 1–11.
- 675 3. Allen LG, Pondella II DJ. Surf zone, coastal pelagic zone, and harbors. *Ecol Mar fishes*  
676 *Calif Adjac waters Univ Calif Press Berkeley.* 2006; 149–166.

- 677 4. Klein YL, Osleeb JP, Viola MR. Tourism-generated earnings in the coastal zone: a  
678 regional analysis. *J Coast Res.* 2004;20: 1080–1088.
- 679 5. McLachlan A, Defeo O, Jaramillo E, Short AD. Sandy beach conservation and recreation:  
680 guidelines for optimising management strategies for multi-purpose use. *Ocean Coast*  
681 *Manag.* 2013;71: 256–268.
- 682 6. Dugan JE, Hubbard DM, Nielsen KJ, Altstatt J, Bursek J. Baseline Characterization of  
683 Sandy Beach Ecosystems Along the South Coast of California - Final Report. 2015.  
684 Available: [https://caseagrants.ucsd.edu/sites/default/files/SCMPA-24-Final-Report\\_0.pdf](https://caseagrants.ucsd.edu/sites/default/files/SCMPA-24-Final-Report_0.pdf)
- 685 7. Schlacher TA, Dugan J, Schoeman DS, Lastra M, Jones A, Scapini F, et al. Sandy beaches  
686 at the brink. *Divers Distrib.* 2007;13: 556–560.
- 687 8. NMFS. Fisheries economics of the United States, 2015. NOAA Technical Memorandum;  
688 2017.
- 689 9. Dugan JE, Hubbard DM, Martin DL, Engle JM, Richards DM, Davis GE, et al.  
690 Macrofauna communities of exposed sandy beaches on the Southern California mainland  
691 and Channel Islands. *Proceedings of the Fifth California Islands Symposium Minerals*  
692 *Management Service Publication.* 2000. pp. 339–346.
- 693 10. Schlacher TA, Schoeman DS, Dugan J, Lastra M, Jones A, Scapini F, et al. Sandy beach  
694 ecosystems: key features, sampling issues, management challenges and climate change  
695 impacts. *Mar Ecol.* 2008;29: 70–90.
- 696 11. Defeo O, McLachlan A, Schoeman DS, Schlacher TA, Dugan J, Jones A, et al. Threats to  
697 sandy beach ecosystems: a review. *Estuar Coast Shelf Sci.* 2009;81: 1–12.
- 698 12. Jaramillo E, Dugan J, Hubbard D, Manzano M, Duarte C. Ranking the ecological effects  
699 of coastal armoring on mobile macroinvertebrates across intertidal zones on sandy

- 700 beaches. *Sci Total Environ.* 2021;755: 142573.
- 701 13. Barnard PL, Dugan JE, Page HM, Wood NJ, Hart JAF, Cayan DR, et al. Multiple climate  
702 change-driven tipping points for coastal systems. *Sci Rep.* 2021;11: 1–13.
- 703 14. Schooler NK, Dugan JE, Hubbard DM. No lines in the sand: Impacts of intense  
704 mechanized maintenance regimes on sandy beach ecosystems span the intertidal zone on  
705 urban coasts. *Ecol Indic.* 2019;106: 105457.
- 706 15. Dugan JE, Emery KA, Alber M, Alexander CR, Byers JE, Gehman AM, et al.  
707 Generalizing ecological effects of shoreline armoring across soft sediment environments.  
708 *Estuaries and coasts.* 2018;41: 180–196.
- 709 16. Manning LM, Peterson CH, Fegley SR. Degradation of surf-fish foraging habitat driven  
710 by persistent sedimentological modifications caused by beach nourishment. *Bull Mar Sci.*  
711 2013;89: 83–106.
- 712 17. Parkinson RW, Ogurcak DE. Beach nourishment is not a sustainable strategy to mitigate  
713 climate change. *Estuar Coast Shelf Sci.* 2018;212: 203–209.
- 714 18. Peterson CH, Bishop MJ, D’Anna LM, Johnson GA. Multi-year persistence of beach  
715 habitat degradation from nourishment using coarse shelly sediments. *Sci Total Environ.*  
716 2014;487: 481–492.
- 717 19. Allen LG, Horn MH. *The ecology of marine fishes: California and adjacent waters.* Univ  
718 of California Press; 2006.
- 719 20. Carlisle JG, Schott JW, Abrahamson NJ. The barred surf perch in Southern California,  
720 Calif. *Dept Fish Fish Bull.* 1960;109.
- 721 21. Kuriyama PT, Branch TA, Hicks AC, Harms JH, Hamel OS. Investigating three sources  
722 of bias in hook-and-line surveys: survey design, gear saturation, and multispecies

- 723 interactions. *Can J Fish Aquat Sci.* 2019;76: 192–207.
- 724 22. Andradi-Brown DA, Macaya-Solis C, Exton DA, Gress E, Wright G, Rogers AD.  
725 Assessing Caribbean shallow and mesophotic reef fish communities using baited-remote  
726 underwater video (BRUV) and diver-operated video (DOV) survey techniques. *PLoS One.*  
727 2016;11: e0168235.
- 728 23. Ceni G, Vieira JP. Looking through a dirty glass: how different can the characterization of  
729 a fish fauna be when distinct nets are used for sampling? *Zool.* 2013;30: 499–505.
- 730 24. Baker R, Sheaves M. Visual surveys reveal high densities of large piscivores in shallow  
731 estuarine nurseries. *Mar Ecol Prog Ser.* 2006;323: 75–82.
- 732 25. Kelly RP, Port J a., Yamahara KM, Martone RG, Lowell N, Thomsen PF, et al.  
733 Harnessing DNA to improve environmental management. *Science* (80- ). 2014;344.  
734 doi:10.1126/science.1251156
- 735 26. Borland HP, Schlacher TA, Gilby BL, Connolly RM, Yabsley NA, Olds AD. Habitat type  
736 and beach exposure shape fish assemblages in the surf zones of ocean beaches. *Mar Ecol*  
737 *Prog Ser.* 2017;570: 203–211.
- 738 27. Schramm KD, Harvey ES, Goetze JS, Travers MJ, Warnock B, Saunders BJ. A  
739 comparison of stereo-BRUV, diver operated and remote stereo-video transects for  
740 assessing reef fish assemblages. *J Exp Mar Bio Ecol.* 2020;524: 151273.
- 741 28. Hodgson G, Maun L, Shuman C. Reef Check Survey Manual. Reef Check, Inst Environ  
742 Univ California, Los Angeles, CA. 2004.
- 743 29. Kushner DJ, Rassweiler A, McLaughlin JP, Lafferty KD. A multi-decade time series of  
744 kelp forest community structure at the California Channel Islands. *Ecology.* 2013;94:  
745 2655. doi:<https://doi.org/10.1890/13-0562R.1>



- 746 30. Lindfield SJ, Harvey ES, McIlwain JL, Halford AR. Silent fish surveys: bubble-free  
747 diving highlights inaccuracies associated with SCUBA-based surveys in heavily fished  
748 areas. Börger L, editor. *Methods Ecol Evol.* 2014;5: 1061–1069. doi:10.1111/2041-  
749 210X.12262
- 750 31. Shelton AO, Kelly RP, O'Donnell JL, Park L, Schwenke P, Greene C, et al.  
751 Environmental DNA provides quantitative estimates of a threatened salmon species. *Biol*  
752 *Conserv.* 2019;237: 383–391. doi:10.1016/j.biocon.2019.07.003
- 753 32. Lowry M, Folpp H, Gregson M, Mckenzie R. A comparison of methods for estimating  
754 fish assemblages associated with estuarine artificial reefs. *Brazilian J Oceanogr.* 2011;59:  
755 119–131.
- 756 33. Beng KC, Corlett RT. Applications of environmental DNA (eDNA) in ecology and  
757 conservation: opportunities, challenges and prospects. *Biodivers Conserv.* 2020;29: 2089–  
758 2121.
- 759 34. Deiner K, Bik HM, Mächler E, Seymour M, Lacoursière-Roussel A, Altermatt F, et al.  
760 Environmental DNA metabarcoding: Transforming how we survey animal and plant  
761 communities. *Mol Ecol.* 2017;26: 5872–5895. doi:10.1111/mec.14350
- 762 35. Taberlet P, Bonin A, Zinger L, Coissac E. *Environmental DNA: For biodiversity research*  
763 *and monitoring.* Oxford University Press; 2018.
- 764 36. Taberlet P, Coissac E, Hajibabaei M, Rieseberg LH. Environmental DNA. *Mol Ecol.*  
765 2012;21: 1789–1793. doi:10.1111/j.1365-294X.2012.05542.x
- 766 37. Djurhuus A, Closek CJ, Kelly RP, Pitz KJ, Michisaki RP, Starks HA, et al. Environmental  
767 DNA reveals seasonal shifts and potential interactions in a marine community. *Nat*  
768 *Commun.* 2020;11: 1–9.

- 769 38. Closek CJ, Santora JA, Starks HA, Schroeder ID, Andruszkiewicz EA, Sakuma KM, et al.  
770 Marine vertebrate biodiversity and distribution within the central California Current using  
771 environmental DNA (eDNA) metabarcoding and ecosystem surveys. *Front Mar Sci*.  
772 2019;6: 732.
- 773 39. Doi H, Inui R, Akamatsu Y, Kanno K, Yamanaka H, Takahara T, et al. Environmental  
774 DNA analysis for estimating the abundance and biomass of stream fish. *Freshw Biol*.  
775 2017;62: 30–39.
- 776 40. Stoeckle MY, Adolf J, Charlop-Powers Z, Dunton KJ, Hinks G, VanMorter SM. Trawl  
777 and eDNA assessment of marine fish diversity, seasonality, and relative abundance in  
778 coastal New Jersey, USA. *ICES J Mar Sci*. 2021;78: 293–304.
- 779 41. Bohmann K, Evans A, Gilbert MTP, Carvalho GR, Creer S, Knapp M, et al.  
780 Environmental DNA for wildlife biology and biodiversity monitoring. *Trends Ecol Evol*.  
781 2014;29: 358–367. doi:10.1016/j.tree.2014.04.003
- 782 42. Thomsen PF, Kielgast J, Iversen LL, Møller PR, Rasmussen M, Willerslev E. Detection of  
783 a diverse marine fish fauna using environmental DNA from seawater samples. *PLoS One*.  
784 2012;7: e41732.
- 785 43. Valentini A, Taberlet P, Miaud C, Civade R, Herder J, Thomsen PF, et al. Next-generation  
786 monitoring of aquatic biodiversity using environmental DNA metabarcoding. *Mol Ecol*.  
787 2015; n/a-n/a. doi:10.1111/mec.13428
- 788 44. Kelly RP, Closek CJ, O'Donnell JL, Kralj JE, Shelton AO, Samhouri JF. Genetic and  
789 manual survey methods yield different and complementary views of an ecosystem. *Front*  
790 *Mar Sci*. 2017;3: 283. doi:<https://doi.org/10.3389/fmars.2016.00283>
- 791 45. Gold ZJ. Design and Implementation of Environmental DNA Metabarcoding Methods for

- 792 Monitoring the Southern California Marine Protected Area Network. UCLA. 2020.  
793 doi:ark:/13030/m5j44187
- 794 46. Thomas AC, Tank S, Nguyen PL, Ponce J, Sinnesael M, Goldberg CS. A system for rapid  
795 eDNA detection of aquatic invasive species. *Environ DNA*. 2019.
- 796 47. LeBlanc F, Belliveau V, Watson E, Coomber C, Simard N, DiBacco C, et al.  
797 Environmental DNA (eDNA) detection of marine aquatic invasive species (AIS) in  
798 Eastern Canada using a targeted species-specific qPCR approach. *Manag Biol Invasions*.  
799 2020;11: 201.
- 800 48. Weltz K, Lyle JM, Ovenden J, Morgan JAT, Moreno DA, Semmens JM. Application of  
801 environmental DNA to detect an endangered marine skate species in the wild. *PLoS One*.  
802 2017;12: e0178124.
- 803 49. Simpfendorfer C, Kyne P, Noble T, Goldsbury J, Basiita R, Lindsay R, et al.  
804 Environmental DNA detects Critically Endangered largetooth sawfish in the wild.  
805 *Endanger Species Res*. 2016;30: 109–116. doi:10.3354/esr00731
- 806 50. Lafferty KD, Benesh KC, Mahon AR, Jerde CL, Lowe CG. Detecting southern  
807 California’s white sharks with environmental DNA. *Front Mar Sci*. 2018;5: 1–6.
- 808 51. West KM, Stat M, Harvey ES, Skepper CL, DiBattista JD, Richards ZT, et al. eDNA  
809 metabarcoding survey reveals fine-scale coral reef community variation across a remote,  
810 tropical island ecosystem. *Mol Ecol*. 2020;29: 1069–1086.
- 811 52. Stat M, Huggett MJ, Bernasconi R, DiBattista JD, Berry TE, Newman SJ, et al.  
812 Ecosystem biomonitoring with eDNA: metabarcoding across the tree of life in a tropical  
813 marine environment. *Sci Rep*. 2017;7: 12240. doi:10.1038/s41598-017-12501-5
- 814 53. Port JA, O’Donnell JL, Romero-Maraccini OC, Leary PR, Litvin SY, Nickols KJ, et al.

- 815            Assessing vertebrate biodiversity in a kelp forest ecosystem using environmental DNA.  
816            Mol Ecol. 2015. doi:<https://doi.org/10.1111/mec.13481>
- 817    54.    Stoeckle MY, Soboleva L, Charlop-Powers Z. Aquatic environmental DNA detects  
818            seasonal fish abundance and habitat preference in an urban estuary. PLoS One. 2017;12.  
819    55.    Andruszkiewicz EA, Starks HA, Chavez FP, Sassoubre LM, Block BA, Boehm AB.  
820            Biomonitoring of marine vertebrates in Monterey Bay using eDNA metabarcoding. PLoS  
821            One. 2017;12: e0176343.
- 822    56.    Thomsen PF, Møller PR, Sigsgaard EE, Knudsen SW, Jørgensen OA, Willerslev E.  
823            Environmental DNA from seawater samples correlate with trawl catches of subarctic,  
824            deepwater fishes. PLoS One. 2016;11. doi:10.1371/journal.pone.0165252
- 825    57.    Meyer R, Ramos MM, Lin M, Schweizer TM, Gold Z, Ramos DR, et al. The CALeDNA  
826            program: Citizen scientists and researchers inventory California's biodiversity. Calif  
827            Agric. 2021;75: 20–32. Available: <http://dx.doi.org/10.3733/ca.2021a0001>
- 828    58.    Freiwald J, Meyer R, Caselle JE, Blanchette CA, Hovel K, Neilson D, et al. Citizen  
829            science monitoring of marine protected areas: Case studies and recommendations for  
830            integration into monitoring programs. Mar Ecol. 2018;39: e12470.  
831            doi:10.1111/maec.12470
- 832    59.    Biggs J, Ewald N, Valentini A, Gaboriaud C, Dejean T, Griffiths RA, et al. Using eDNA  
833            to develop a national citizen science-based monitoring programme for the great crested  
834            newt (*Triturus cristatus*). Biol Conserv. 2014;183: 19–28.  
835            doi:10.1016/j.biocon.2014.11.029
- 836    60.    Di Muri C, Handley LL, Bean CW, Li J, Peirson G, Sellers GS, et al. Read counts from  
837            environmental DNA (eDNA) metabarcoding reflect fish abundance and biomass in

- 838 drained ponds. *Metabarcoding and Metagenomics*. 2020;4: e56959.
- 839 61. Ushio M, Murakami H, Masuda R, Sado T, Miya M, Sakurai S, et al. Quantitative  
840 monitoring of multispecies fish environmental DNA using high-throughput sequencing.  
841 *Metabarcoding and Metagenomics*. 2018;2: e23297.
- 842 62. O'Donnell JL, Kelly RP, Shelton AO, Samhouri JF, Lowell NC, Williams GD. Spatial  
843 distribution of environmental DNA in a nearshore marine habitat. *PeerJ*. 2017;5: e3044.  
844 doi:10.7717/peerj.3044
- 845 63. West K, Travers MJ, Stat M, Harvey ES, Richards ZT, DiBattista JD, et al. Large-scale  
846 eDNA metabarcoding survey reveals marine biogeographic break and transitions over  
847 tropical north-western Australia. *Divers Distrib*. 2021.
- 848 64. Gold Z, Sprague J, Kushner DJ, Zerecero E, Barber PH. eDNA metabarcoding as a  
849 biomonitoring tool for marine protected areas. *bioRxiv*. 2020; 2020.08.20.258889.  
850 doi:10.1101/2020.08.20.258889
- 851 65. Lamy T, Pitz KJ, Chavez FP, Yorke CE, Miller RJ. Environmental DNA reveals the fine-  
852 grained and hierarchical spatial structure of kelp forest fish communities. *Sci Rep*.  
853 2021;11: 1–13.
- 854 66. Collins RA, Wangensteen OS, O'Gorman EJ, Mariani S, Sims DW, Genner MJ.  
855 Persistence of environmental DNA in marine systems. *Commun Biol*. 2018;1: 1–11.
- 856 67. Murakami H, Yoon S, Kasai A, Minamoto T, Yamamoto S, Sakata MK, et al. Dispersion  
857 and degradation of environmental DNA from caged fish in a marine environment. *Fish*  
858 *Sci*. 2019;85: 327–337. doi:<https://doi.org/10.1007/s12562-019-01341-z>
- 859 68. Ely T, Barber PH, Man L, Gold Z. Short-lived detection of an introduced vertebrate  
860 eDNA signal in a nearshore rocky reef environment. *PLoS One*. 2021;16: e0245314.

- 861 69. Shogren AJ, Tank JL, Andruszkiewicz E, Olds B, Mahon AR, Jerde CL, et al. Controls on  
862 eDNA movement in streams: Transport, Retention, and Resuspension /704/158/2464  
863 /704/242 /45/77 article. *Sci Rep.* 2017;7. doi:10.1038/s41598-017-05223-1
- 864 70. Andruszkiewicz EA, Koseff JR, Fringer OB, Ouellette NT, Lowe AB, Edwards CA, et al.  
865 Modeling environmental DNA transport in the coastal ocean using Lagrangian particle  
866 tracking. *Front Mar Sci.* 2019;6: 477. doi:10.3389/fmars.2019.00477
- 867 71. Kelly RP, Gallego R, Jacobs-Palmer E. The effect of tides on nearshore environmental  
868 DNA. *PeerJ.* 2018;6: e4521. doi:<https://doi.org/10.7717/peerj.4521>
- 869 72. Yamamoto S, Minami K, Fukaya K, Takahashi K, Sawada H, Murakami H, et al.  
870 Environmental DNA as a “snapshot” of fish distribution: A case study of Japanese jack  
871 mackerel in Maizuru Bay, Sea of Japan. *PLoS One.* 2016;11.  
872 doi:10.1371/journal.pone.0149786
- 873 73. Monuki K, Barber PH, Gold Z. eDNA captures depth partitioning in a kelp forest  
874 ecosystem. *PLoS One.* 2021;16: e0253104.
- 875 74. French B, Wilson S, Holmes T, Kendrick A, Rule M, Ryan N. Comparing five methods  
876 for quantifying abundance and diversity of fish assemblages in seagrass habitat. *Ecol*  
877 *Indic.* 2021;124: 107415.
- 878 75. Gutiérrez-Martínez M, Muñoz-Lechuga R, Rodríguez-García C, Sanz-Fernández V,  
879 Cabrera-Castro R. Spatial-temporal patterns of fish and macroinvertebrate communities in  
880 sandy beach surf zones: Short and medium-term variations. *J Sea Res.* 2021;168: 101993.
- 881 76. Stoeckle MY, Das Mishu M, Charlop-Powers Z. Improved environmental DNA reference  
882 library detects overlooked marine fishes in New Jersey, United States. *Front Mar Sci.*  
883 2020;7: 226.

- 884 77. Leary SL, Underwood W, Anthony R, Cartner S, Corey D, Grandin T, et al. AVMA  
885 guidelines for the euthanasia of animals: 2013 edition. American Veterinary Medical  
886 Association Schaumburg, IL; 2013.
- 887 78. Vargas-Fonseca E, Olds AD, Gilby BL, Connolly RM, Schoeman DS, Huijbers CM, et al.  
888 Combined effects of urbanization and connectivity on iconic coastal fishes. *Divers Distrib.*  
889 2016;22: 1328–1341.
- 890 79. Ellis DM. Evaluation of video camera technique for indexing abundances of juvenile pink  
891 snapper *Pristipomoides filamentosus*, and other Hawaiian insular shelf fishes. *Fish Bull.*  
892 1995;93: 67–77.
- 893 80. Gold Z, Curd E, Goodwin K, Choi E, Frable B, Thompson A, et al. Improving  
894 Metabarcoding Taxonomic Assignment: A Case Study of Fishes in a Large Marine  
895 Ecosystem. 2021.
- 896 81. Spens J, Evans AR, Halfmaerten D, Knudsen SW, Sengupta ME, Mak SST, et al.  
897 Comparison of capture and storage methods for aqueous microbial eDNA using an  
898 optimized extraction protocol: advantage of enclosed filter. Yu D, editor. *Methods Ecol*  
899 *Evol.* 2017;8: 635–645. doi:10.1111/2041-210X.12683
- 900 82. Miya M, Sato Y, Fukunaga T, Sado T, Poulsen JY, Sato K, et al. MiFish, a set of universal  
901 PCR primers for metabarcoding environmental DNA from fishes: detection of more than  
902 230 subtropical marine species. *R Soc Open Sci.* 2015;2: 150088.  
903 doi:10.1098/rsos.150088
- 904 83. Curd EE, Gold Z, Kandlikar GS, Gomer J, Ogden M, O’Connell T, et al. Anacapa: an  
905 environmental DNA toolkit for processing multilocus metabarcode datasets. *Methods Ecol*  
906 *Evol.* 2019;10: 1469– 1475. doi:<https://doi.org/10.1111/2041-210X.13214>

- 907 84. R Core Team. R: A Language and Environment for Statistical Computing. Vienna;  
908 Austria; 2020.
- 909 85. Costello M, Fleharty M, Abreu J, Farjoun Y, Ferriera S, Holmes L, et al. Characterization  
910 and remediation of sample index swaps by non-redundant dual indexing on massively  
911 parallel sequencing platforms. *BMC Genomics*. 2018;19: 332.
- 912 86. Goldberg CS, Turner CR, Deiner K, Klymus KE, Thomsen PF, Murphy MA, et al.  
913 Critical considerations for the application of environmental DNA methods to detect  
914 aquatic species. 2016 [cited 20 Mar 2019]. doi:10.1111/2041-210X.12595
- 915 87. Chambert T, Pilliod DS, Goldberg CS, Doi H, Takahara T. An analytical framework for  
916 estimating aquatic species density from environmental DNA. *Ecol Evol*. 2018;8: 3468–  
917 3477. doi:10.1002/ece3.3764
- 918 88. McMurdie PJ, Holmes S. phyloseq: an R package for reproducible interactive analysis and  
919 graphics of microbiome census data. *PLoS One*. 2013;8: e61217.
- 920 89. Oksanen J, Blanchet FG, Friendly M, Kindt R, Legendre P, McGlinn D, et al. *vegan*:  
921 Community Ecology Package. 2020.
- 922 90. Froese R, Pauly D. *FishBase*. Fisheries Centre, University of British Columbia; 2010.
- 923 91. Kells VA, Rocha LA, Allen LG. *A field guide to coastal fishes: from Alaska to California*.  
924 JHU Press; 2016.
- 925 92. Chen H, Boutros PC. *VennDiagram*: a package for the generation of highly-customizable  
926 Venn and Euler diagrams in R. *BMC Bioinformatics*. 2011;12: 1–7.
- 927 93. Wickham H, François R, Henry L, Müller K. *dplyr: A Grammar of Data Manipulation*.  
928 2021.
- 929 94. Wickham H. *ggplot2: Elegant Graphics for Data Analysis*. Springer-Verlag New York;



- 930 2016.
- 931 95. Hsieh TC, Ma KH, Chao A. iNEXT: an R package for rarefaction and extrapolation of  
932 species diversity (Hill numbers). *Methods Ecol Evol.* 2016;7: 1451–1456.  
933 doi:<https://doi.org/10.1111/2041-210X.12613>
- 934 96. Royle JA, Link WA. Generalized site occupancy models allowing for false positive and  
935 false negative errors. *Ecology.* 2006;87: 835–841.
- 936 97. Schmidt BR, Kery M, Ursenbacher S, Hyman OJ, Collins JP. Site occupancy models in  
937 the analysis of environmental DNA presence/absence surveys: a case study of an  
938 emerging amphibian pathogen. *Methods Ecol Evol.* 2013;4: 646–653.
- 939 98. Gold Z, Wall AR, Curd EE, Kelly RP, Pentcheff ND, Ripma L, et al. eDNA  
940 metabarcoding bioassessment of endangered fairy shrimp (*Branchinecta* spp.). *Conserv*  
941 *Genet Resour.* 2020;12: 685–690.
- 942 99. Team RC. R: A language and environment for statistical computing. Vienna, Austria: R  
943 Foundation for Statistical Computing; 2014. 2014.
- 944 100. Goodrich B, Gabry J, Ali I, Brilleman S. rstanarm: Bayesian applied regression modeling  
945 via Stan. *R Packag version.* 2018;2: 1758.
- 946 101. Parikh R, Mathai A, Parikh S, Sekhar GC, Thomas R. Understanding and using  
947 sensitivity, specificity and predictive values. *Indian J Ophthalmol.* 2008;56: 45.
- 948 102. Esmaeili YS, Corte GN, Checon HH, Gomes TRC, Lefcheck JS, Amaral ACZ, et al.  
949 Comprehensive assessment of shallow surf zone fish biodiversity requires a combination  
950 of sampling methods. *Mar Ecol Prog Ser.* 2021;667: 131–144.
- 951 103. Boussarie G, Bakker J, Wangensteen OS, Mariani S, Bonnin L, Juhel J-B, et al.  
952 Environmental DNA illuminates the dark diversity of sharks. *Sci Adv.* 2018;4: eaap9661.

- 953 104. Bakker J, Wangensteen OS, Chapman DD, Boussarie G, Buddo D, Guttridge TL, et al.  
954 Environmental DNA reveals tropical shark diversity in contrasting levels of anthropogenic  
955 impact. *Sci Rep.* 2017;7: 1–11.
- 956 105. Cole VJ, Harasti D, Lines R, Stat M. Estuarine fishes associated with intertidal oyster  
957 reefs characterized using environmental DNA and baited remote underwater video.  
958 *Environ DNA.* 2021.
- 959 106. Stat M, John J, DiBattista JD, Newman SJ, Bunce M, Harvey ES. Combined use of eDNA  
960 metabarcoding and video surveillance for the assessment of fish biodiversity. *Conserv*  
961 *Biol.* 2019;33: 196–205.
- 962 107. Fediajevaite J, Priestley V, Arnold R, Savolainen V. Meta-analysis shows that  
963 environmental DNA outperforms traditional surveys, but warrants better reporting  
964 standards. *Ecol Evol.* 2021.
- 965 108. Mirimin L, Desmet S, Romero DL, Fernandez SF, Miller DL, Mynott S, et al. Don't catch  
966 me if you can—Using cabled observatories as multidisciplinary platforms for marine fish  
967 community monitoring: An in situ case study combining Underwater Video and  
968 environmental DNA data. *Sci Total Environ.* 2021;773: 145351.
- 969 109. Bakker J, Wangensteen OS, Chapman DD, Boussarie G, Buddo D, Guttridge TL, et al.  
970 Environmental DNA reveals tropical shark diversity in contrasting levels of anthropogenic  
971 impact. *Sci Rep.* 2017;7: 16886. doi:10.1038/s41598-017-17150-2
- 972 110. Bassett DK, Montgomery JC. Investigating nocturnal fish populations in situ using baited  
973 underwater video: with special reference to their olfactory capabilities. *J Exp Mar Bio*  
974 *Ecol.* 2011;409: 194–199.
- 975 111. Jeunen G-J, Urban L, Lewis R, Knapp M, Lamare M, Rayment W, et al. Marine

- 976 environmental DNA (eDNA) for biodiversity assessments: a one-to-one comparison  
977 between eDNA and baited remote underwater video (BRUV) surveys. *Authorea Prepr.*  
978 2020.
- 979 112. Longo G, Bernardi G. The evolutionary history of the embiotocid surfperch radiation  
980 based on genome-wide RAD sequence data. *Mol Phylogenet Evol.* 2015;88: 55–63.
- 981 113. Min MA, Barber PH, Gold Z. MiSebastes: An eDNA metabarcoding primer set for  
982 rockfishes (genus *Sebastes*). *Conserv Genet Resour.* 2021; 1–10.
- 983 114. Love MS, Passarelli JK. *Miller and Lea’s Guide to the Coastal Marine Fishes of*  
984 *California*. 2nd. University of California Agriculture and Natural Resources; 2020.
- 985 115. Yamamoto S, Masuda R, Sato Y, Sado T, Araki H, Kondoh M, et al. Environmental DNA  
986 metabarcoding reveals local fish communities in a species-rich coastal sea. *Sci Rep.*  
987 2017;7: 40368.
- 988 116. Andruszkiewicz Allan E, Zhang WG, C Lavery A, F Govindarajan A. Environmental  
989 DNA shedding and decay rates from diverse animal forms and thermal regimes. *Environ*  
990 *DNA.* 2021;3: 492–514.
- 991 117. Thalinger B, Rieder A, Teuffenbach A, Pütz Y, Schwerte T, Wanzenboeck J, et al. The  
992 effect of activity, energy use, and species identity on environmental DNA shedding of  
993 freshwater fish. *Front Ecol Evol.* 2021;9: 73.
- 994 118. Tillotson MD, Kelly RP, Duda JJ, Hoy M, Kralj J, Quinn TP. Concentrations of  
995 environmental DNA (eDNA) reflect spawning salmon abundance at fine spatial and  
996 temporal scales. *Biol Conserv.* 2018;220: 1–11. doi:10.1016/J.BIOCON.2018.01.030
- 997 119. Barnes MA, Turner CR. The ecology of environmental DNA and implications for  
998 conservation genetics. *Conserv Genet.* 2016;17: 1–17. doi:10.1007/s10592-015-0775-4

- 999 120. McLaren MR, Willis AD, Callahan BJ. Consistent and correctable bias in metagenomic  
1000 sequencing experiments. *Elife*. 2019;8: e46923.
- 1001 121. Kelly RP, Shelton AO, Gallego R. Understanding PCR processes to Draw Meaningful  
1002 conclusions from environmental DNA Studies. *Sci Rep*. 2019;9: 1–14.  
1003 doi:<https://doi.org/10.1038/s41598-019-48546-x>
- 1004 122. Jarman SN, Berry O, Bunce M. The value of environmental DNA biobanking for long-  
1005 term biomonitoring. *Nat Ecol Evol*. 2018;2: 1192–1193.
- 1006 123. Goodwin K, Davis J, Strom M, Werner C. NOAA’Omics Strategy: Strategic Application  
1007 of Transformational Tools. 2020.  
1008

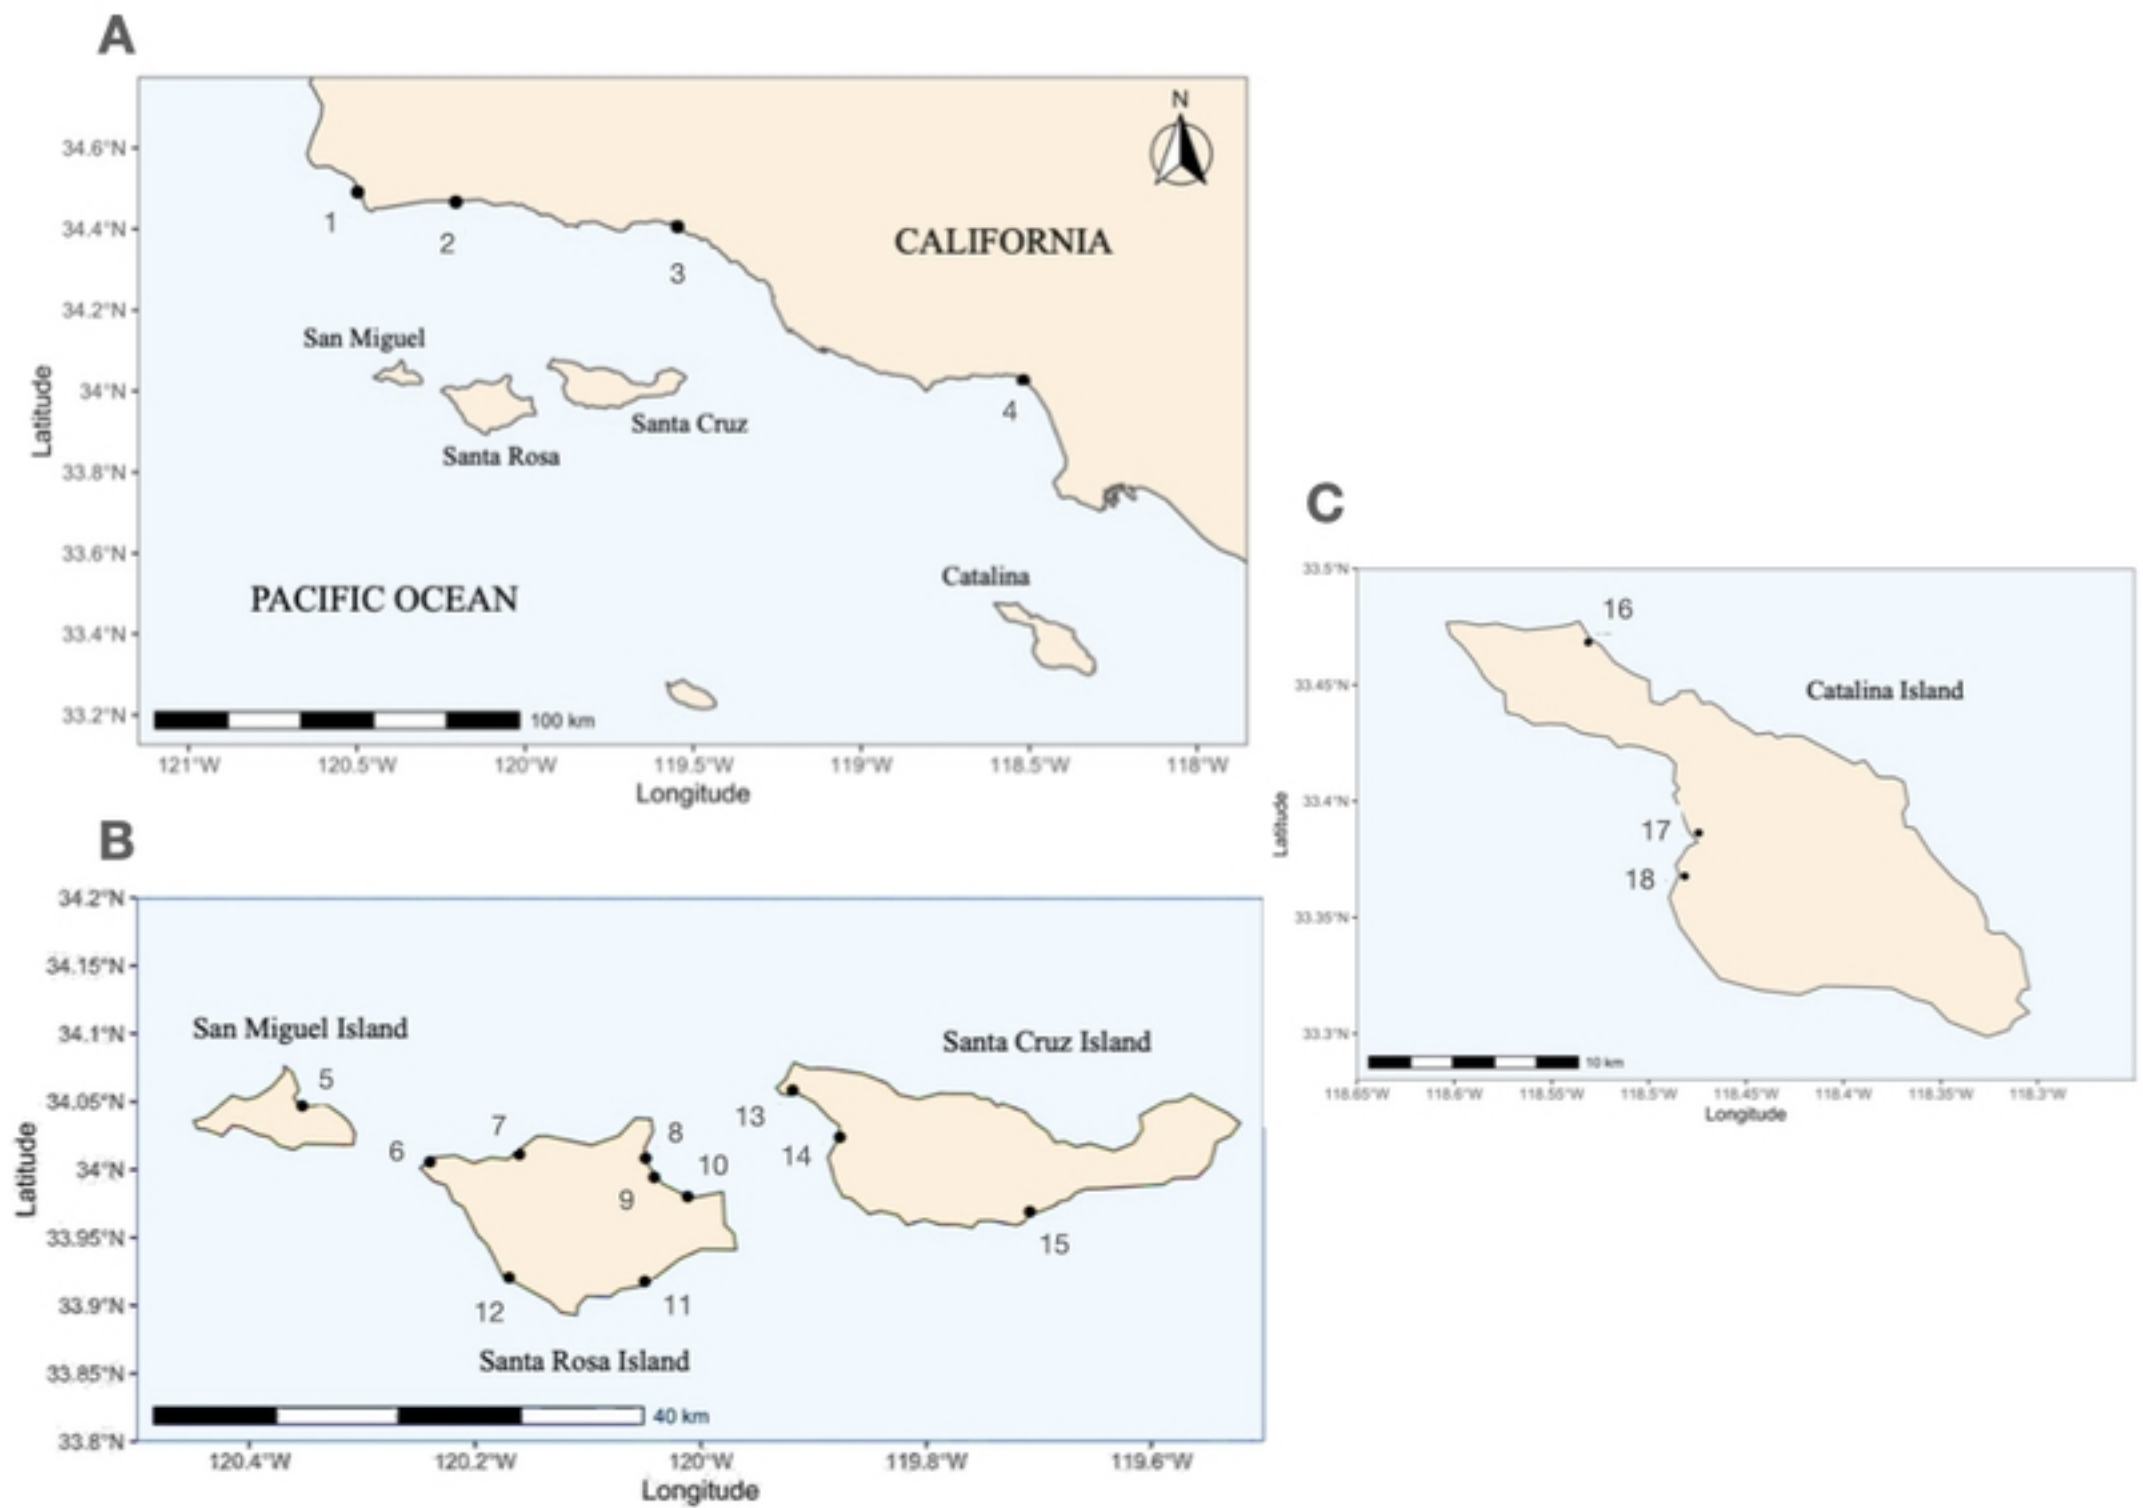

Figure 1

BRUV

Seine

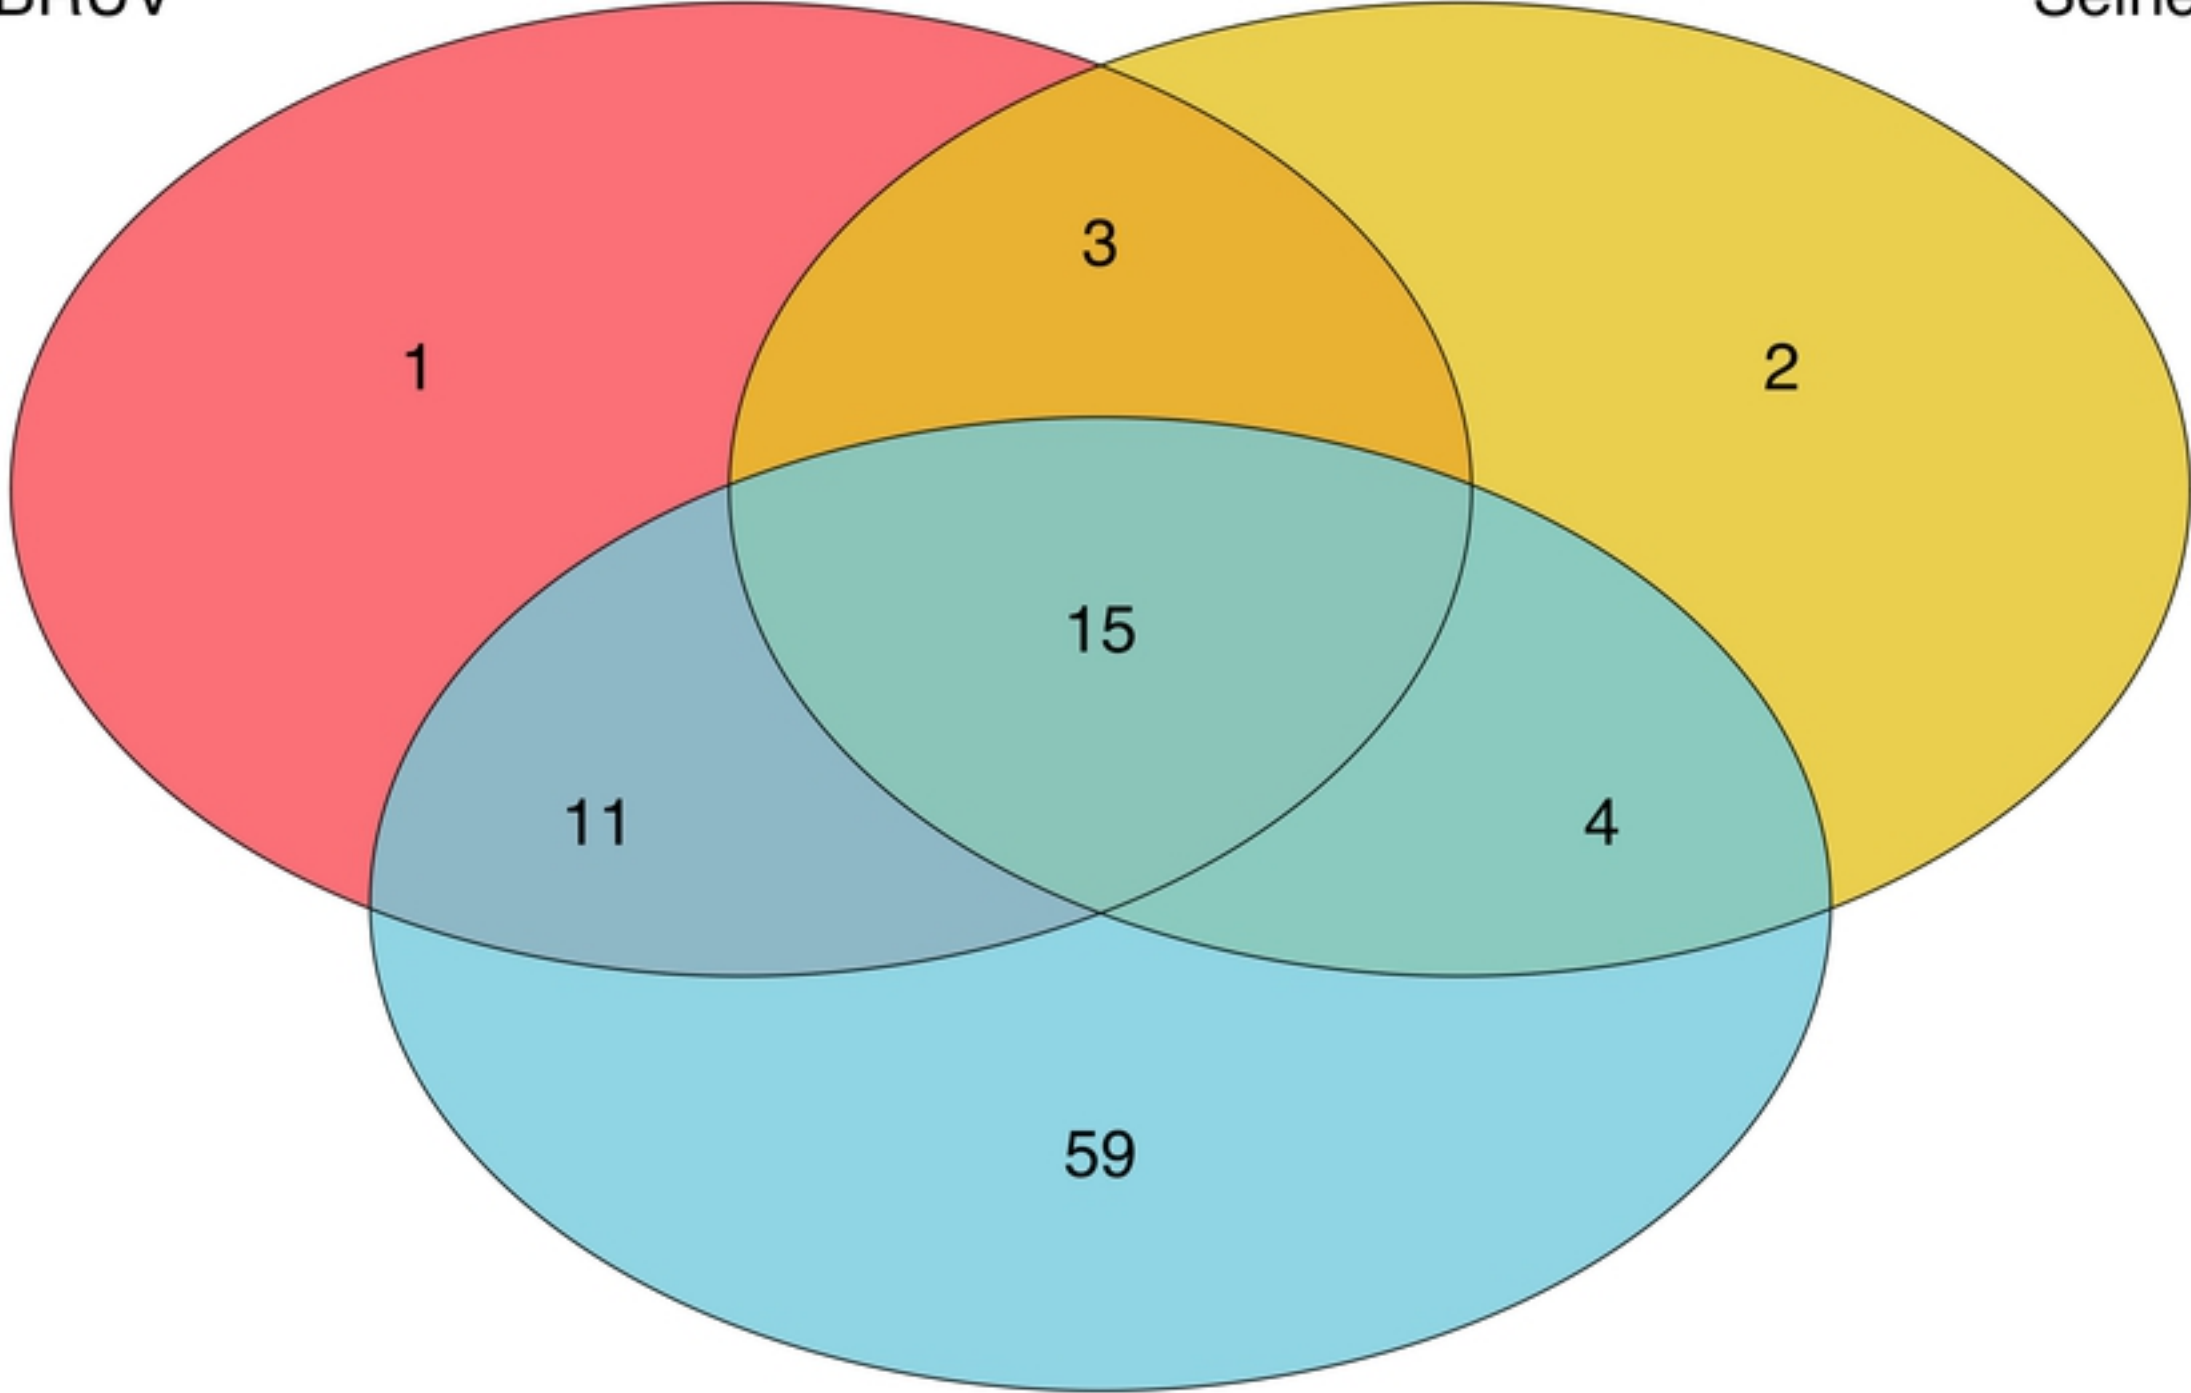

eDNA

Figure 2

# Constrained Analysis of Principal Components

All Detected Species

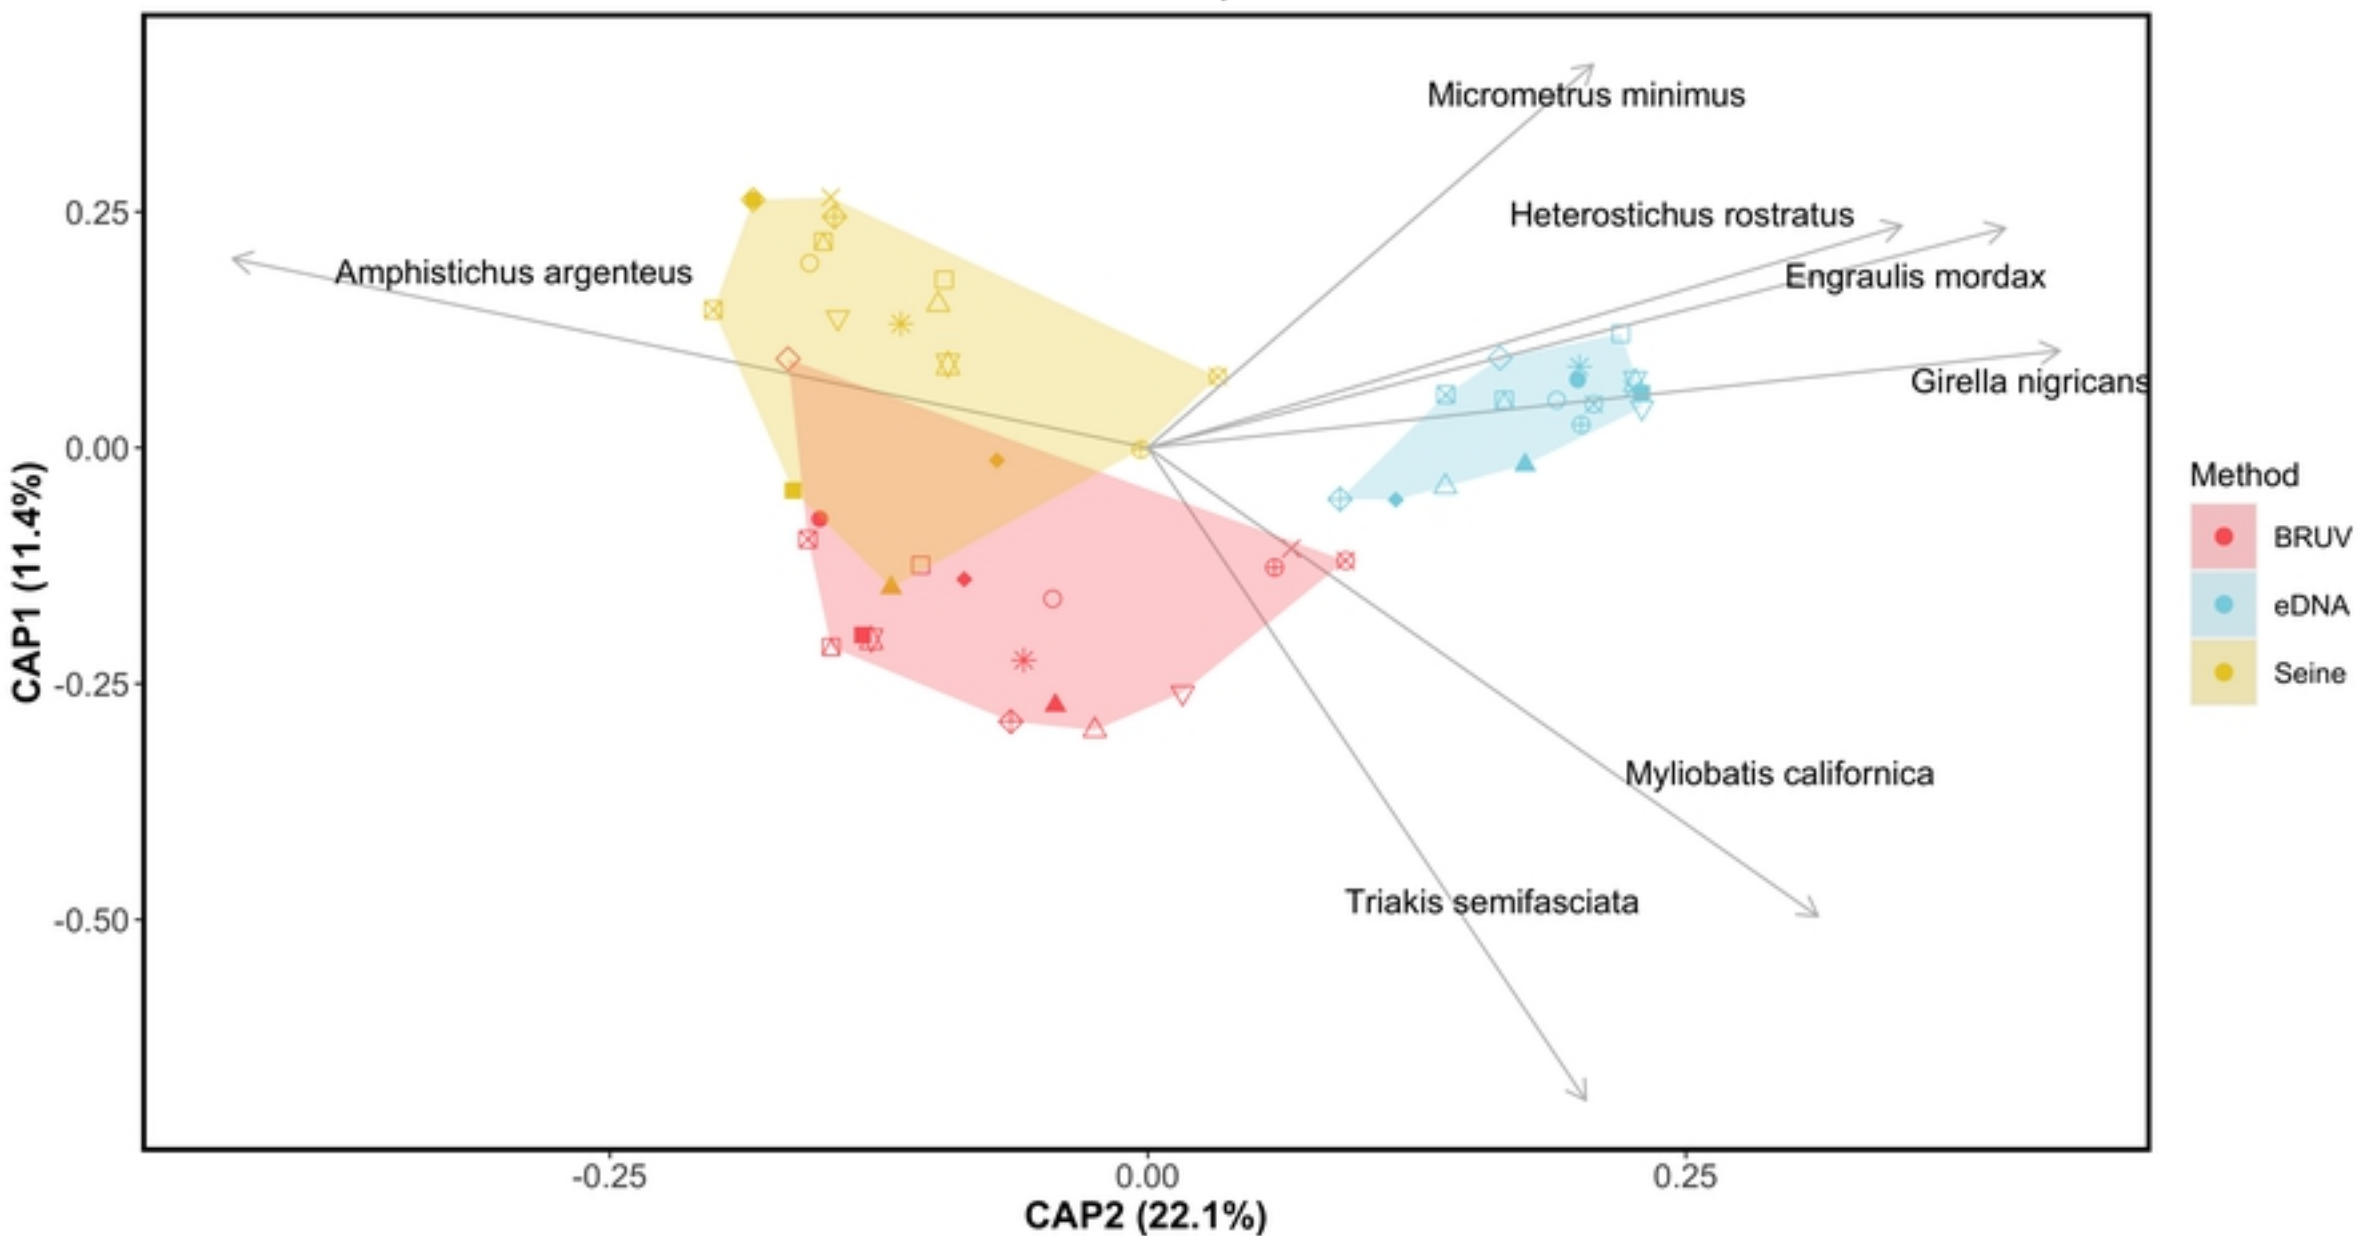

Figure 3

# Site-Species Co-Detections

## All 30 Visual and eDNA Detected Species

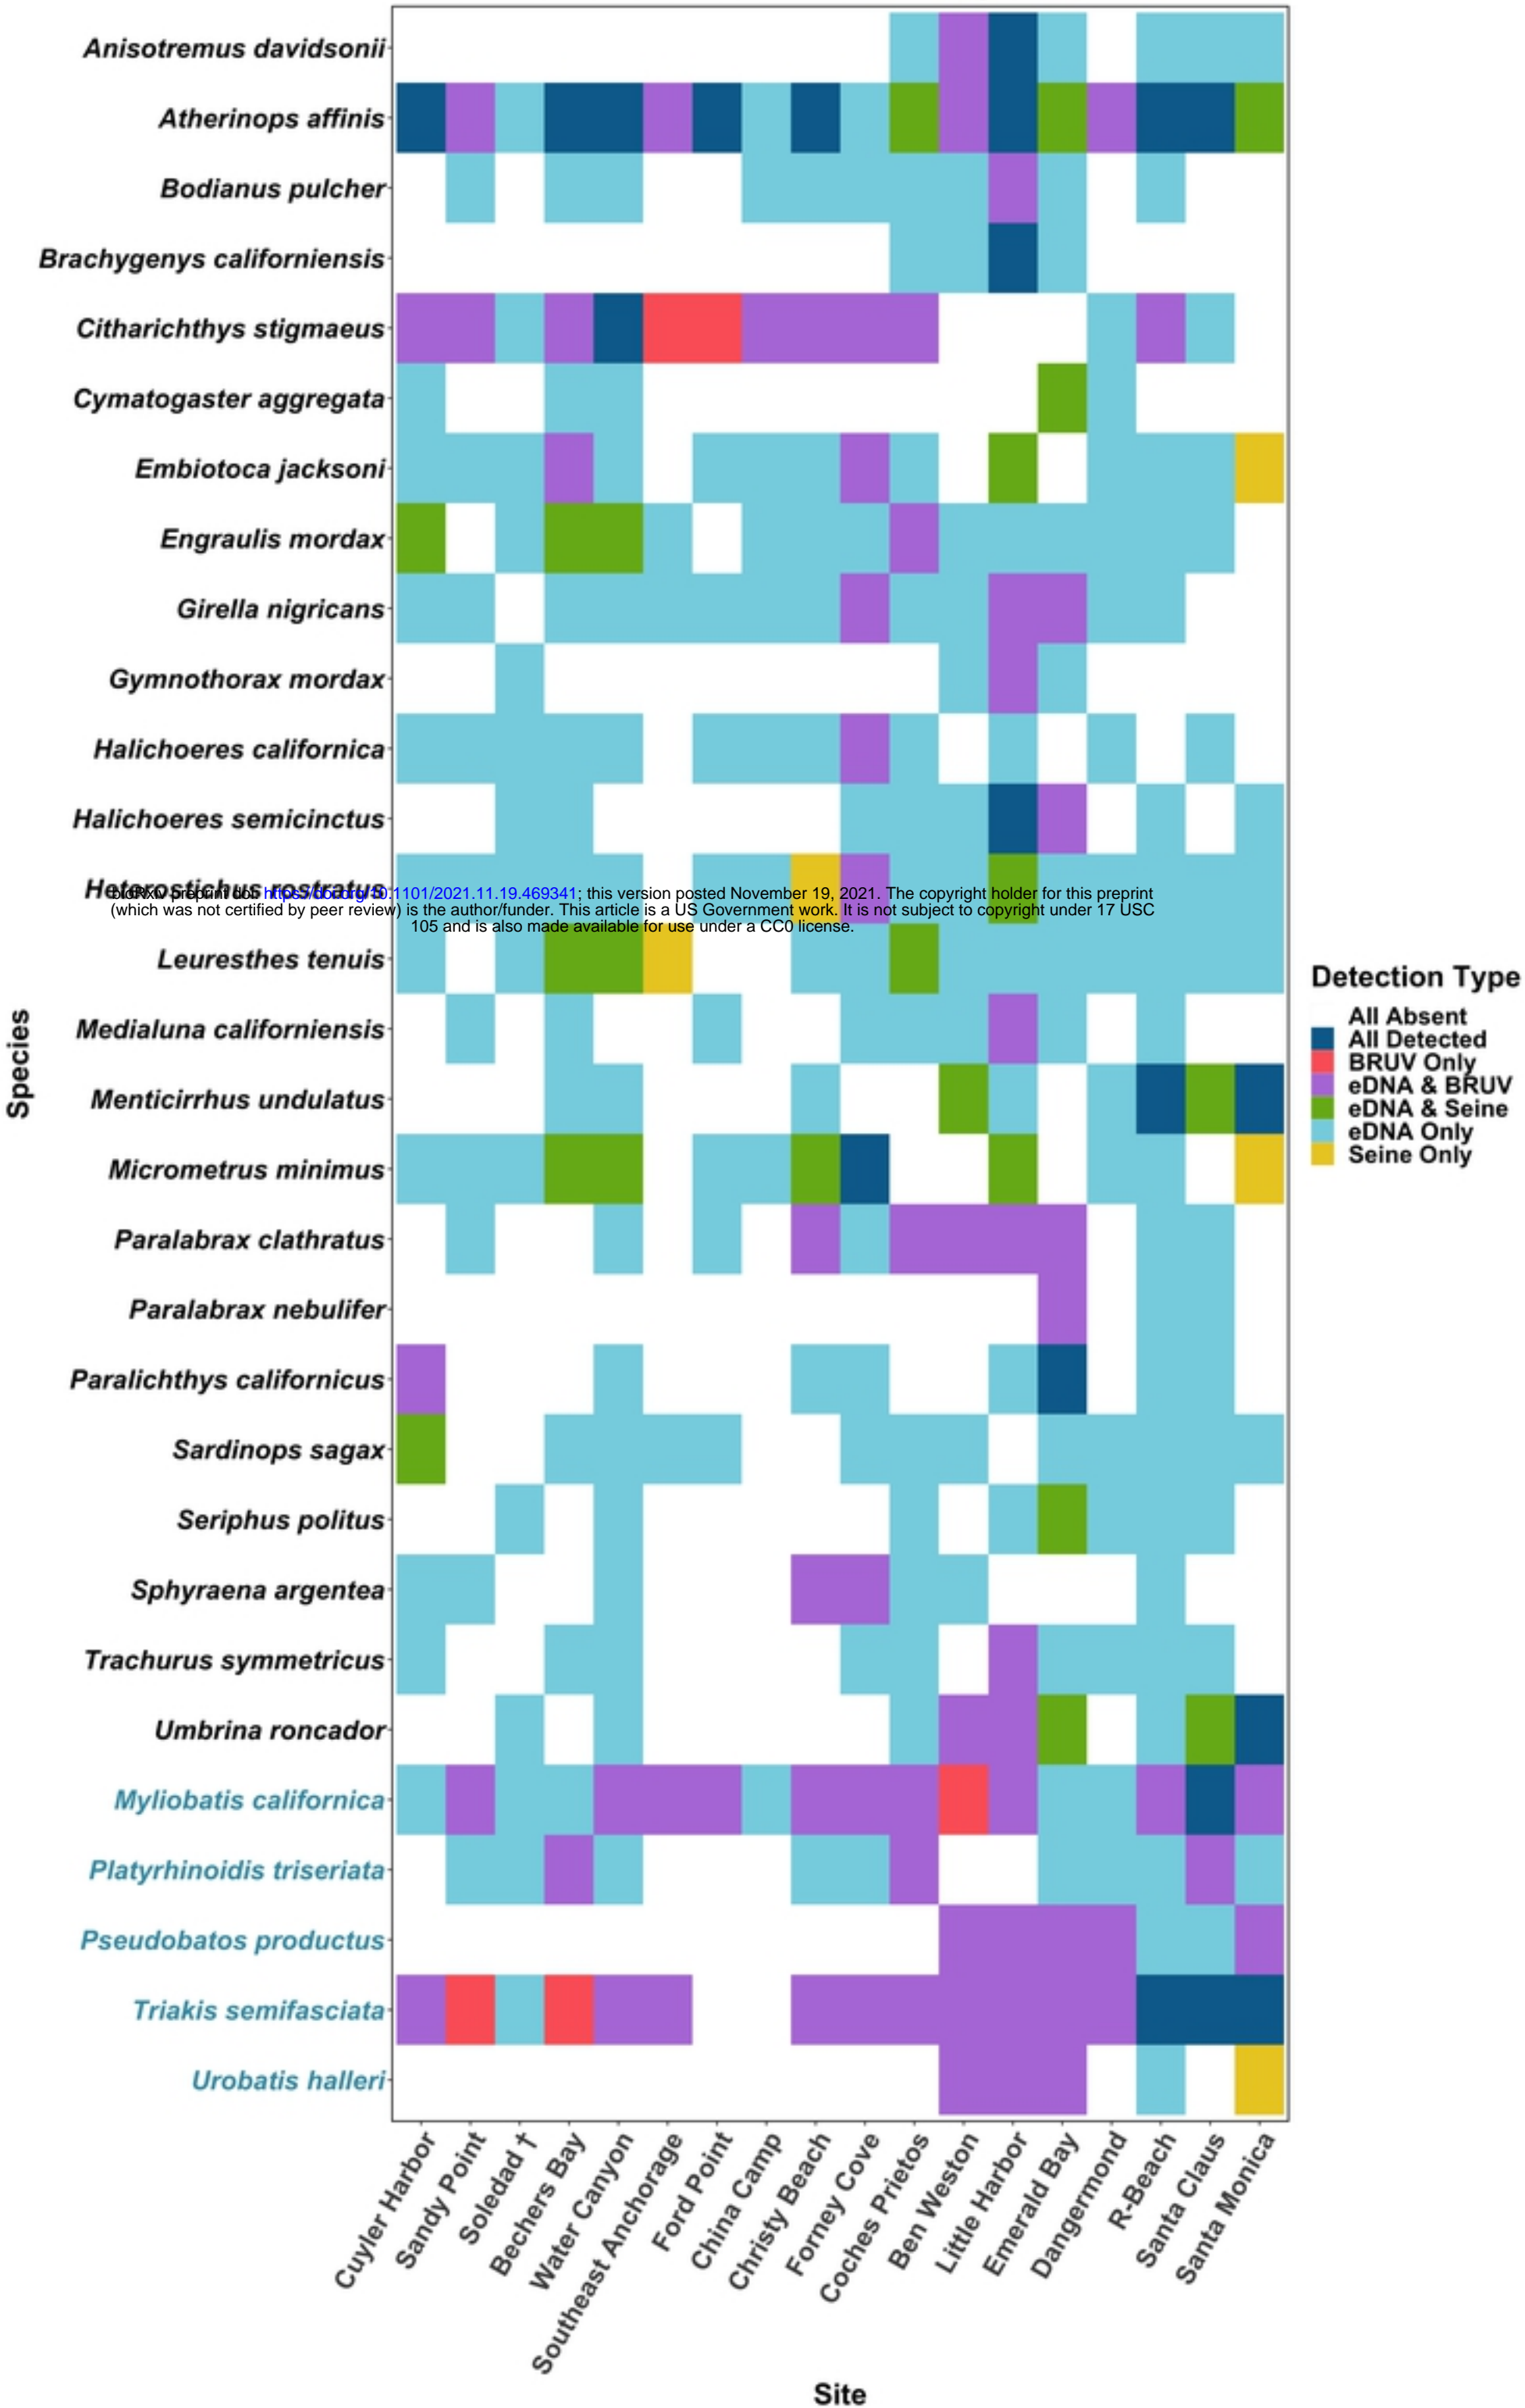

Figure 4



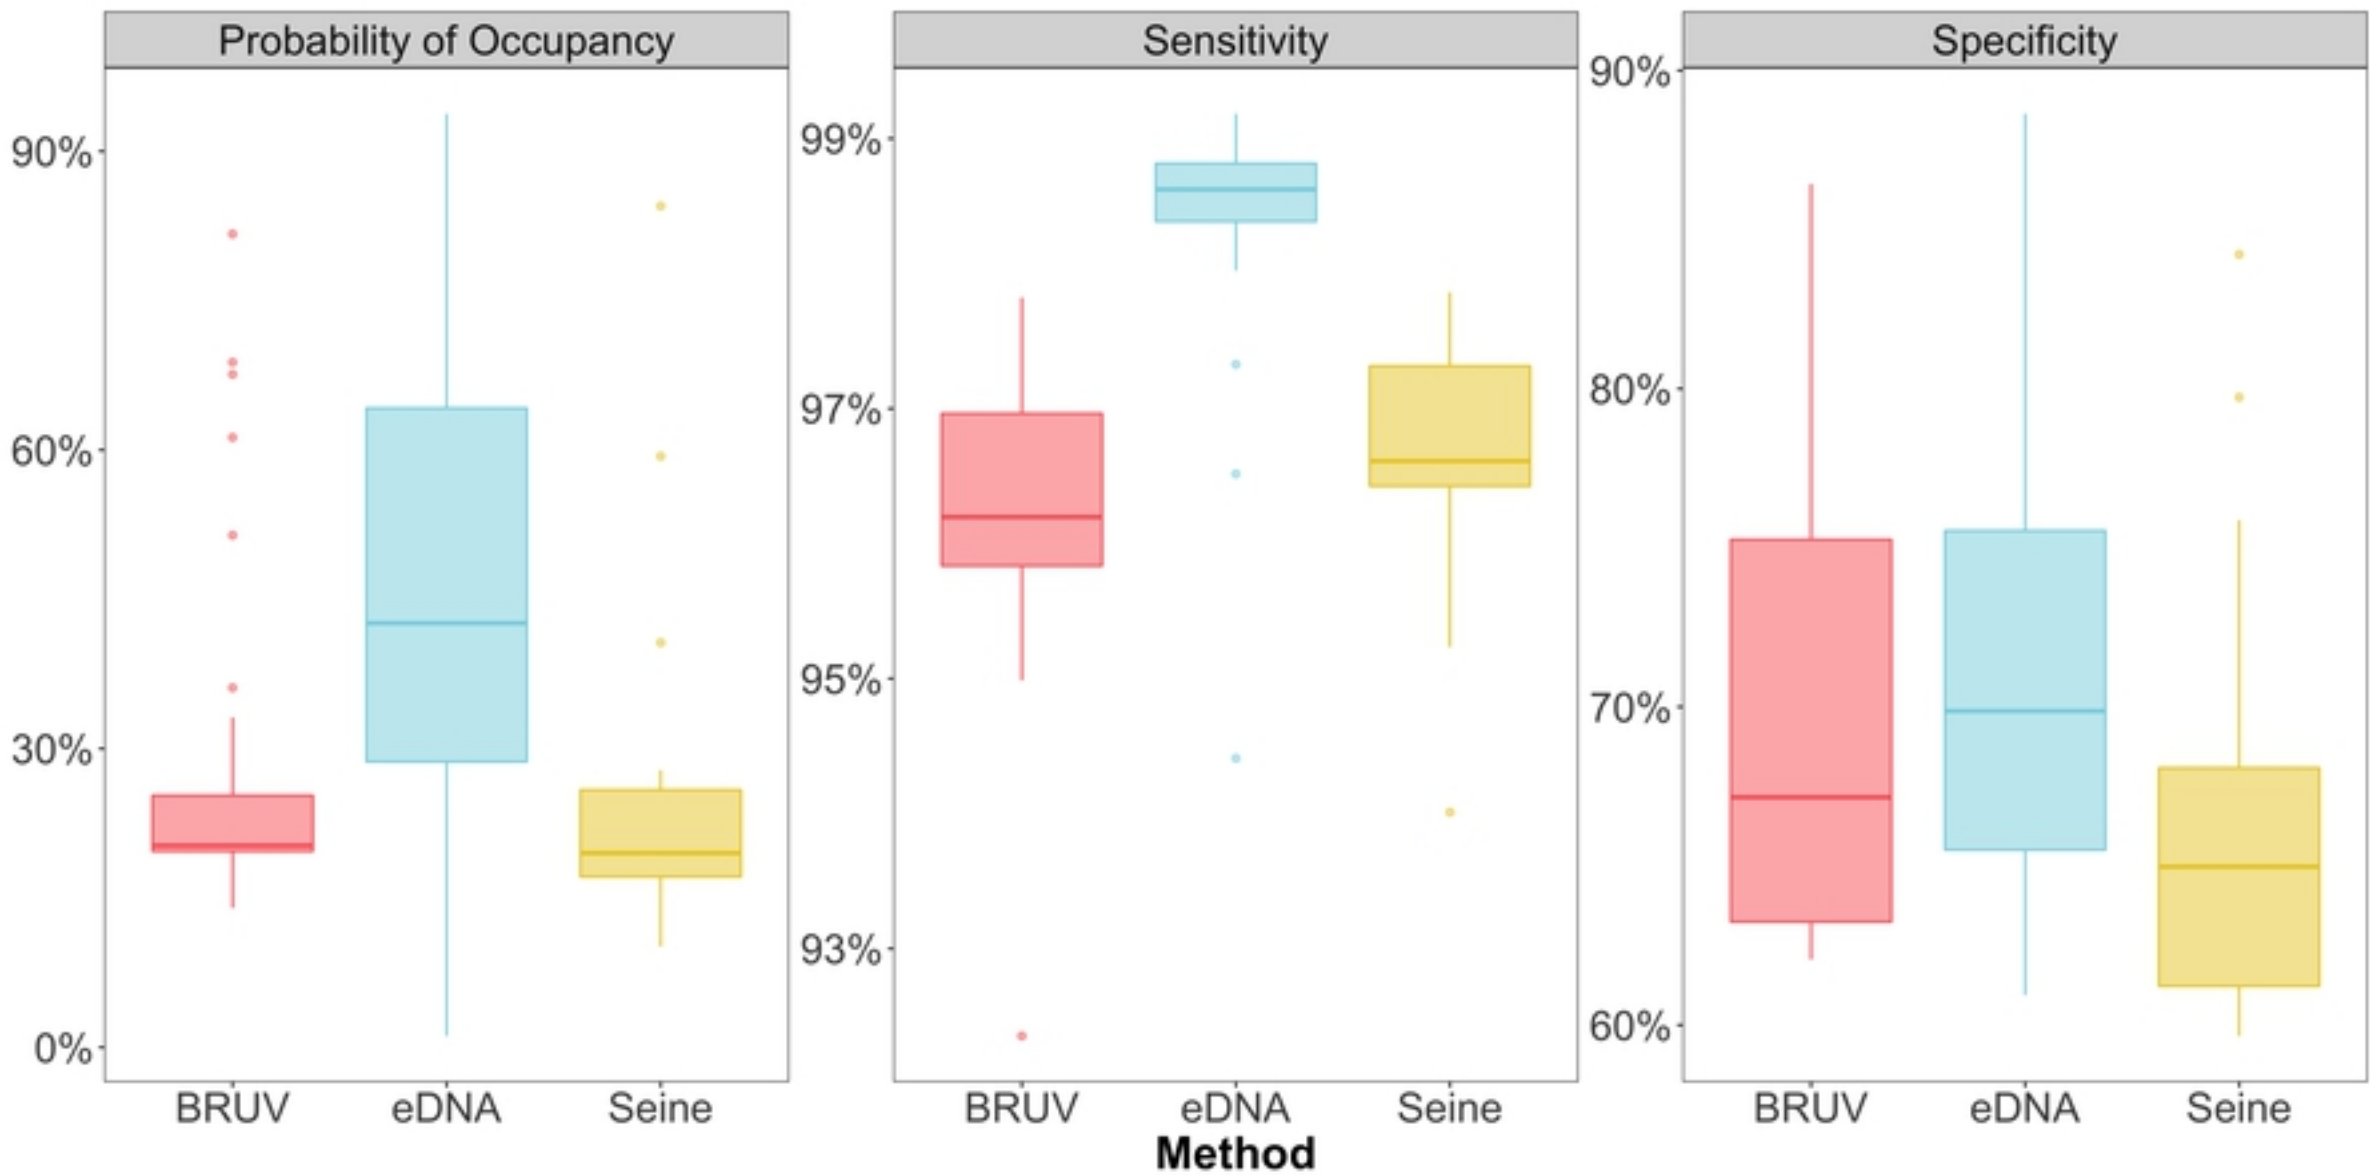

Figure 5

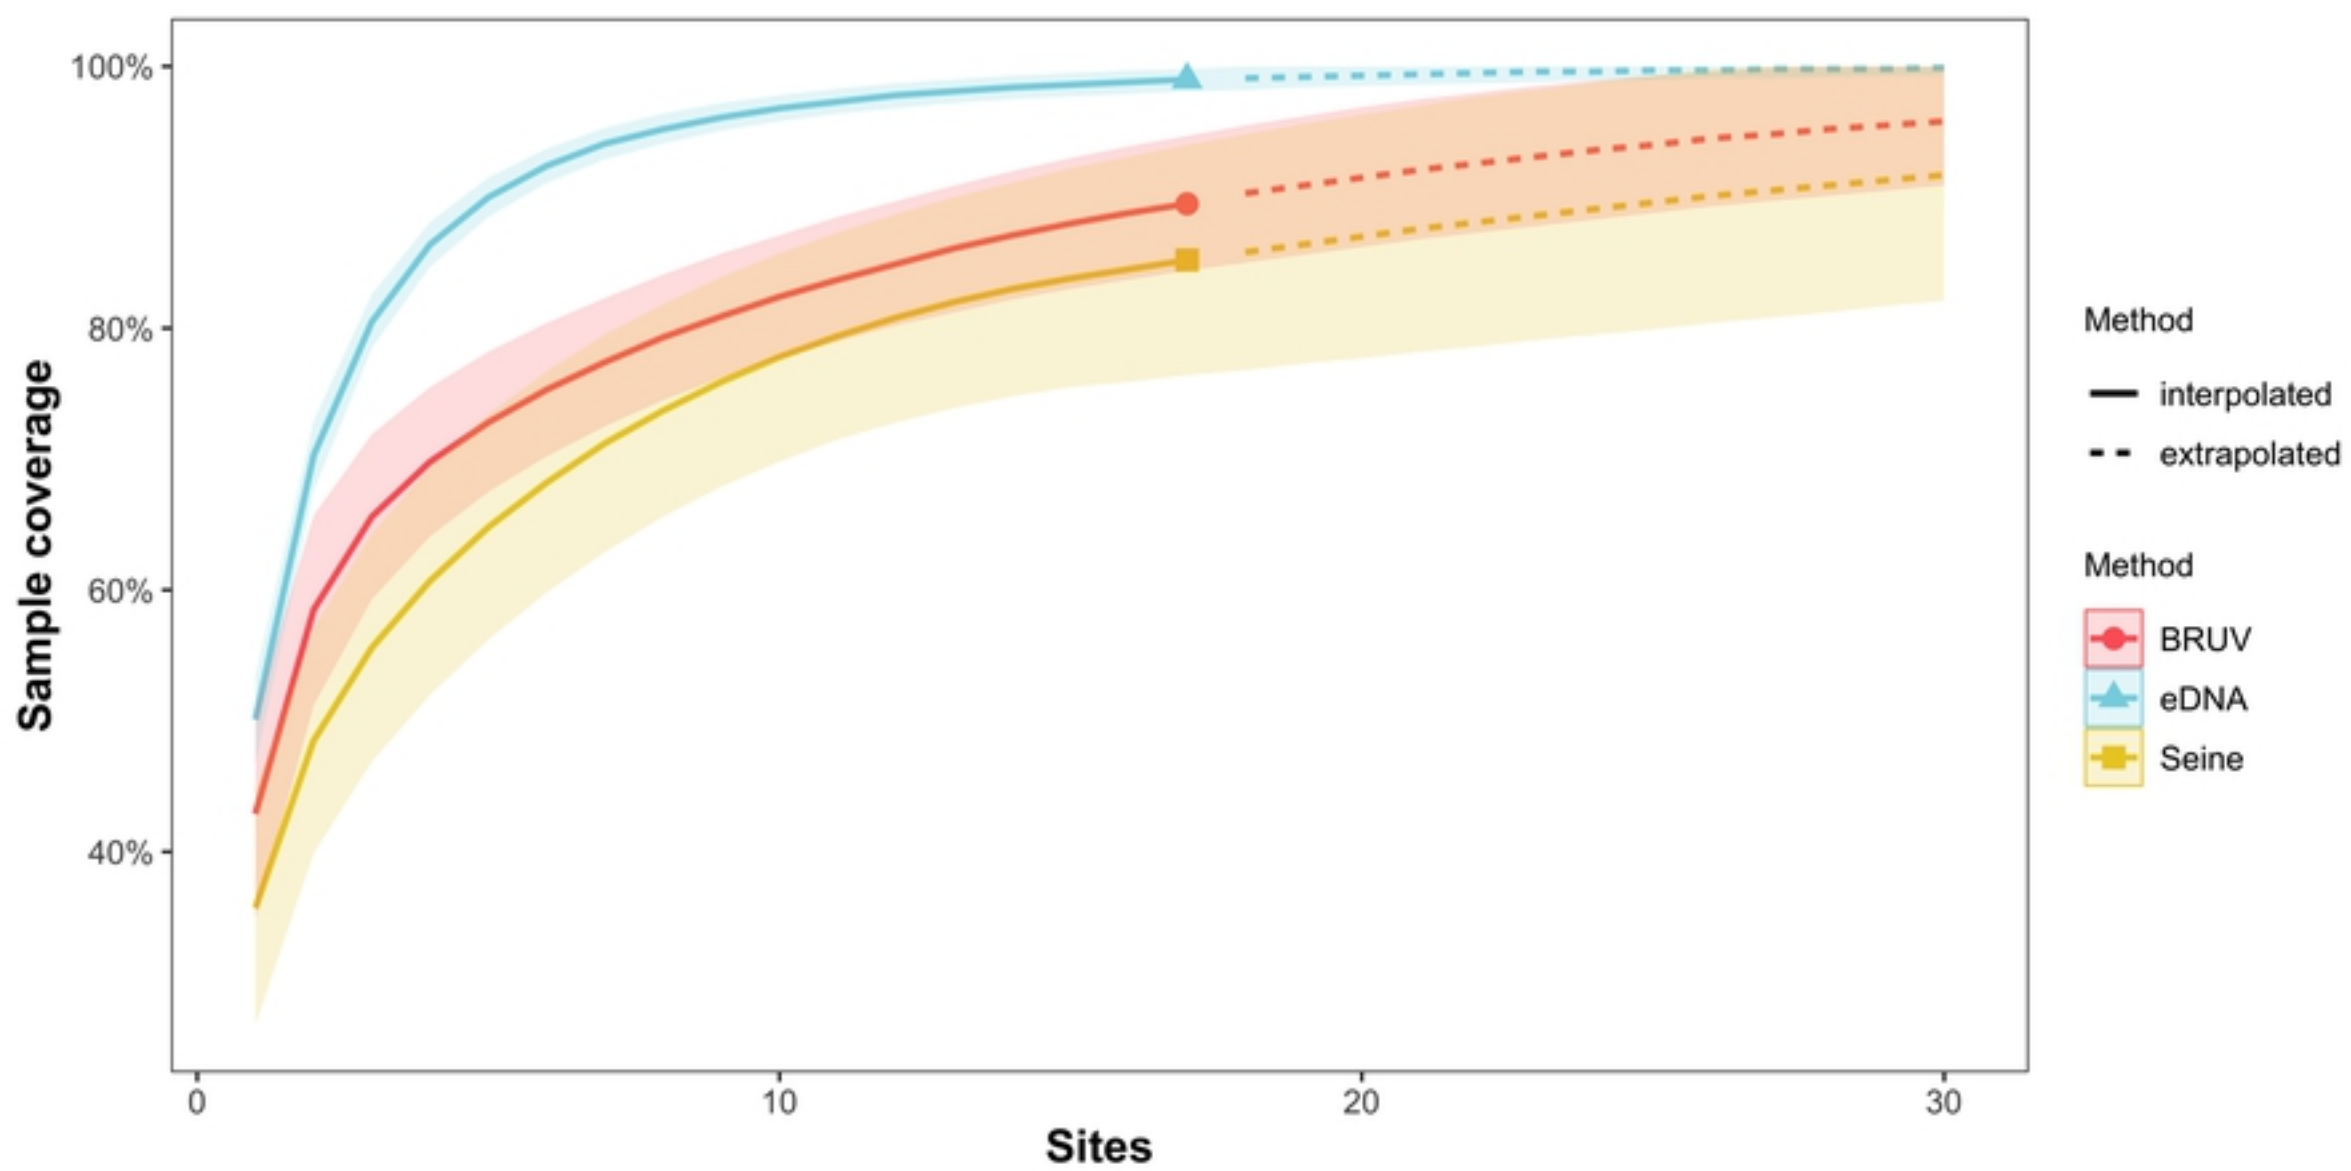

Figure 6
